1 Kre28-Spc105 interaction is essential for Spc105 loading at the  
2 kinetochore.

3 Babhrubahan Roy<sup>1\*</sup>, Janice Sim<sup>1</sup>, Simon J. Y. Han<sup>1</sup>, Ajit P. Joglekar<sup>1\*</sup>

4 1 Cell and Developmental Biology, University of Michigan Medical School, Ann Arbor,  
5 Michigan, United States of America

6 \* Correspondence: babhru@med.umich.edu, ajitj@umich.edu

7 Running head: Kre28-Spc105 interaction is important for their kinetochore localization

8 Abbreviations: Kinetochore (KT), Microtubule (MT), Spindle assemble checkpoint  
9 (SAC), Structured middle domain (SMD)

10

11 **Abstract**

12 Kinetochores are macromolecular protein assemblies that attach sister chromatids to  
13 spindle microtubules and mediate accurate chromosome segregation during mitosis.  
14 The outer kinetochore consists of the KMN network, a protein super complex made of  
15 Knl1 (yeast Spc105), Mis12 (yeast Mtw1) and Ndc80 (yeast Ndc80), which harbors sites  
16 for microtubule binding. Within the KMN network, Spc105 acts as interaction hub of  
17 components involved in spindle assembly checkpoint (SAC) signaling. It is known that  
18 Spc105 forms a complex with kinetochore component Kre28. However, where Kre28  
19 physically localizes in the budding yeast kinetochore is not clear. The exact function of  
20 Kre28 at the kinetochore is also unknown. Here, we reveal how Spc105 and Kre28  
21 interact and how they are organized within bioriented yeast kinetochores using genetics  
22 and cell biological experiments. We also identify the interaction interface between the  
23 two proteins and show that this interaction is important for Spc105 protein turn-over and  
24 essential for their mutual recruitment at the kinetochores. We created several truncation  
25 mutants of kre28 that do not localize at the kinetochores and so cannot mediate Spc105  
26 loading at the kinetochores. When we over-expressed these mutants, they could sustain  
27 the cell viability even though failed to facilitate proper SAC activation and/or error

28 correction. Thus, we inferred that Kre28 indirectly contributes to chromosome  
29 biorientation and high-fidelity segregation by regulating Spc105 localization at the  
30 kinetochores.

31

32

### 33 **Introduction**

34 During eukaryotic cell division, kinetochores facilitate faithful segregation of genetic  
35 material from mother to daughter cells. Each kinetochore is large protein machine that  
36 assembles on a specialized chromatin domain called the centromere and establishes  
37 end-on attachments between the sister chromatids and spindle microtubules emanating  
38 from opposite spindle poles. The budding yeast *S. cerevisiae* has one of the ‘simplest’  
39 kinetochores known to date. Yet, it harbors ~70 protein subunits. Components of the  
40 yeast kinetochore can be divided in two main categories. First is the centromeric DNA  
41 binding components and their associated network, known as CCAN (constitutive  
42 centromere associated network). The second comprises the microtubule binding protein  
43 network: the KMN super-complex, the fungi-specific Dam1 complex and the microtubule  
44 plus end binding protein Stu2 [1-5]. The budding yeast kinetochore incorporates an  
45 invariant copy number of each of these proteins positioned at well-defined average  
46 locations along the kinetochore-microtubule attachment (Figure 1A and S1B, [6, 7]). For  
47 molecular and cell biologists, the microtubule binding protein network of budding yeast  
48 serves as an excellent model to determine how they implement kinetochore functions.

49 Spc105 is as an essential kinetochore protein that gets co-purified with COMA complex  
50 subunit Mcm21 and with MIND complex (Mtw1-Nsl1-Nnf1-Dsn1) [8, 9]. It forms a  
51 complex with another essential kinetochore protein, Kre28, also known as Ydr532C.  
52 Kre28 is an orthologue of human Zwint1, *C. elegans* Kbp-5, and *S. pombe* Sos7 [9-12].  
53 Previous studies, using *in-vitro* and *in-vivo* experiments, provide some insights in how  
54 Spc105 and Kre28 are assembled at the kinetochores, but it is not clear what the  
55 specific function of Kre28 is, how it is aligned in the kinetochore microtubule attachment  
56 sites and how it contributes to kinetochore functions [13-15]. Here we investigate the

57 localization of Kre28 in kinetochore microtubule attachment sites of bioriented  
58 kinetochores and its role in kinetochore microtubule attachment and spindle assembly  
59 checkpoint activation in yeast.

60

## 61 **Results**

### 62 **Localization of Kre28 in the KMN network of bioriented kinetochores.**

63 Proper localization of Spc105 at the kinetochore is essential for SAC activation,  
64 maintenance, and silencing. Therefore, determining the precise organization and  
65 alignment of Spc105 in the KMN network is crucial to understand assembly of  
66 components required for accurate activation and silencing of SAC [16-19]. Kre28, being  
67 an essential component of the kinetochore may also contribute to the incorporation of  
68 Spc105 into the yeast kinetochore. Zwint1, human orthologue of Kre28 localizes very  
69 close to Cdc20 at the human kinetochores [20, 21]. Therefore, localization of yeast  
70 Kre28 also may be important for proper SAC activation and silencing.

71 To determine Kre28's position with respect to Spc105, we first had to fully define how  
72 Spc105 is organized within the yeast kinetochore. Previous studies show that the C-  
73 terminal RWD domain of Spc105 binds directly to the Mtw1 complex and remains in  
74 proximity of Spc24/Spc25 C-termini [14, 22, 23]. On the other hand, the N-terminus of  
75 Spc105 (abbreviated as N-Spc105) consists of a long, disordered phosphodomain that  
76 lies somewhere between the Dam1 complex and the C-termini of Ndc80 and Nuf2  
77 within the Ndc80 complex [6, 7, 24]. To map out the overall organization of the Spc105  
78 phosphodomain, we inserted a GFP at locations within Spc105 that demarcate domains  
79 of predicted secondary structure (see Fig. S1). Additionally, we tagged three different  
80 kinetochore subunits to position mCherry at different locations along the kinetochore-  
81 microtubule attachment (Fig. S1). Quantification of FRET between the GFP inserted in  
82 Spc105 and one of the three mCherry acceptors shows that despite being discorded,  
83 the Spc105 phosphodomain localization is mostly limited to a span between the Dam1  
84 complex and the C-terminus of the Ndc80 subunit (abbreviated at Ndc80-C) of the  
85 Ndc80 complex. The disordered nature of the phosphodomain also gave rise to FRET

86 between different sections of adjacent Spc105 molecules (Fig. S1D). Having  
87 established Spc105, we examined localization of Kre28 by centroid measurement and  
88 FRET assay. Previous literatures suggested that the C-terminal structured domains of  
89 Spc105 harbor interaction sites for Kre28 [25, 26].

90 To define the localization of Kre28 within the KMN network of bioriented kinetochores,  
91 first we performed high resolution colocalization to measure the mean separation  
92 between Kre28-C and the N termini of the Ndc80 subunit (N-Ndc80) in the bioriented  
93 kinetochores of yeast (Figure 1A, [7]). We observed that C termini of Kre28 is positioned  
94 between 45-50 nm from N-Ndc80, which is consistent with previously published work  
95 with Zwint1 [21].

96 To determine Kre28 localization with more precision, we quantified FRET between of  
97 Kre28-C with either Spc24-C or Ndc80-C in metaphase cells. In both cases, we  
98 obtained low to moderate proximity ratio indicating that Kre28-C may localize  
99 somewhere between C termini of Spc24 and Ndc80 (Figure 1B). The absence of FRET  
100 between adjacent Kre28 C termini (Kre28-GFP/Kre28-mCherry) indicated that the C  
101 termini of Kre28 molecules are farther apart than 10nm in metaphase (Figure 1C). We  
102 also measured FRET between Kre28-mCherry and GFP inserted at different positions  
103 of Spc105 (222<sup>nd</sup>, 455<sup>th</sup>, 709<sup>th</sup>, or the C terminus) to find that the C termini of Kre28 are  
104 proximal of the kinetochore binding RWD domain (RING finger, WD repeat, DEAD-like  
105 helicases, interacts with Mtw1 complex) of Spc105 (Figure 1D and 1E). A previous  
106 study suggested that the stoichiometry of Kre28 and Spc105 is 2:1 [11]. However, a  
107 comparison of the intensity of Kre28-GFP or Kre28-mCherry signal per kinetochore  
108 revealed that there is one molecule of Kre28 per Spc105 molecule in bioriented  
109 kinetochores of yeast (Figure S2 A-D).

110

111 **Kre28 interacts with structured middle domain of Spc105 (amino acid 507-638)**  
112 **but not with the kinetochore binding domain.**

113 Studies of Zwint1 (orthologue of Kre28 in human) found that it interacts with a domain  
114 within amino acid 1980-2109 of human Spc105 [25]. Protein cross-linking experiments

115 also revealed that coiled coil domains kre28<sup>128–169</sup> and kre28<sup>229–259</sup> interacts with that of  
116 spc105<sup>551-711</sup> [13]. We wanted to uncover the domains within both Kre28 and Spc105  
117 that are necessary for their mutual interactions.

118 To study these domains in the ex-vivo condition, we first used the yeast two hybrid  
119 assay. We chose Kre28 fragments (amino acid 1-201 and 202-385, based on predicted  
120 secondary structure of Kre28,  
121 [http://www.compbio.dundee.ac.uk/jpred4/results/jp\\_OMYEJWN/jp\\_OMYEJWN.svg.html](http://www.compbio.dundee.ac.uk/jpred4/results/jp_OMYEJWN/jp_OMYEJWN.svg.html)  
122 ) and Spc105 structured middle domain (SMD, 455-708) and the C-terminal RWD  
123 domain of Spc105 (amino acid 709-917 [14]). Both Kre28<sup>FL</sup> and Kre28<sup>1-201</sup> showed  
124 interactions with SMD as indicated by the growth of colonies co-expressing  
125 GBD+spc105<sup>SMD</sup>, GAD+Kre28<sup>FL</sup> and GBD+spc105<sup>SMD</sup>, GAD+kre28<sup>1-201</sup> in synthetic  
126 dextrose plates lacking histidine. Interestingly, we did not see any interactions between  
127 Kre28<sup>FL</sup> and spc105<sup>SMD+RWD</sup> (Figure 2A). This may be because of the misfolding of  
128 spc105<sup>SMD+RWD</sup> fusion with GAL4 binding domain (GBD\_C1). It is also possible that  
129 RWD domain interferes with dimerization of SMD and Kre28, pointing to a regulatory  
130 mechanism. To dissect the interaction between spc105<sup>SMD</sup> and kre28<sup>1-201</sup> more  
131 thoroughly, we used smaller fragments (1-126 and 1-80) for our yeast two hybrid assay  
132 with spc105<sup>SMD</sup>. We did not notice any interaction using these combinations (Figure 2A).  
133 Furthermore, we noticed a significant contrast in colony growth between the  
134 combinations of spc105<sup>SMD</sup>+Kre28<sup>FL</sup> and that of spc105<sup>SMD</sup>+kre28<sup>1-201</sup> which denotes a  
135 change in the strength of interaction with spc105<sup>SMD</sup>. In conclusion, our yeast two hybrid  
136 assay data indicated that spc105<sup>SMD</sup> binding domain may lie within kre28<sup>127-201</sup>.

137 Next, we mapped the Kre28 interacting domain of Spc105 *in-vivo*. We performed  
138 domain mapping experiments where we truncated the mid strand domain of Spc105  
139 (amino acid 313-708) at different residues based on predicted secondary structure (Fig.  
140 2B). We constructed versions of GFP labeled Spc105 with different truncations in the  
141 mid strand domain ( $\Delta$ 313-455 harboring only the unstructured region,  $\Delta$ 313-507  
142 containing unstructured region and a small helical domain,  $\Delta$ 313-638 that contains  
143 unstructured region and an alpha helix rich domain of SMD and  $\Delta$ 313-709 that  
144 encompasses the entire mid strand domain, Figure 2B top right) and transformed them

145 in a heterozygous diploid strain (AJY3278, *SPC105* $\Delta$ ::*NAT*). We examined the  
146 localization of these mutants by microscopy. First, we looked at the kinetochore  
147 localizations of  $\Delta$ 313-455 and  $\Delta$ 313-507, for which we observed no discernable  
148 difference in localization when compared to wild-type (Figure 2B right). Our nuclear  
149 localization signal (NLS) analyses ([nls-mapper.iab.keio.ac.jp/cgi-bin/NLS\\_Mapper\\_y.cgi](http://nls-mapper.iab.keio.ac.jp/cgi-bin/NLS_Mapper_y.cgi),  
150 see the methods section) indicated residues of 337-345 (SSNKRRKLD, score 9.0)  
151 and/or that of 599N-625L (score 6.9) contain nuclear localization signals. However,  
152 previously we have shown that the mutation of 340KRRK343 to alanine residues does  
153 not affect the kinetochore localization of the mutant [27]. Therefore, this region of 313-  
154 507 is not essential for kinetochore localization of Spc105. Truncation of 313-638 or  
155 313-709 completely abrogated kinetochore localization of Spc105. According to our  
156 analysis, *spc105*<sup>599-625</sup> may harbor a NLS and deletion of this signal may have  
157 abrogated kinetochore localization of the mutants expressing *spc105* <sup>$\Delta$ 313-638</sup> or  
158 *spc105* <sup>$\Delta$ 313-709</sup>. We introduced SV40-NLS (NLS<sup>SV40</sup>) at the N-terminus of *spc105* <sup>$\Delta$ 313-  
159 638::GFP</sup> to check if nuclear localization of this mutant rescues its loading at the  
160 kinetochores (Figure 2B, bottom left). However, we did not observe any kinetochore  
161 specific GFP localization.

162 Subsequently we wanted to check whether these truncation mutants can support cell  
163 viability. To address this, we induced sporulation/meiosis in heterozygous diploid strains  
164 expressing these truncated molecules of *spc105* ( $\Delta$ 313-455 or  $\Delta$ 313-507). We observed  
165 that they were able to complement deletion of endogenous *SPC105* (*spc105* $\Delta$ ). We can  
166 conclude that the domain of 313-507 is not essential for any activity of Spc105 that  
167 contributes to cell viability. On the contrary, the *spc105* mutants where domain of 313-  
168 638 or 313-709 are truncated, were unable to rescue the viability of *spc105* $\Delta$ . Even  
169 fusion of SV40-NLS (NLS<sup>SV40</sup>) at the N-terminus of *spc105* <sup>$\Delta$ 313-638</sup> did not rescue its  
170 ability to support the cell viability in absence of wild-type Spc105 (Figure 2B right and  
171 bottom left). This set of data reveals that proper localization of Spc105 at the  
172 kinetochore is essential for its accurate function which is associated with the cell  
173 viability. It does not depend on nuclear localization of Spc105.



174 We confirmed above mentioned observations using plasmid-shuffle assay (data not  
175 shown). Therefore, we hypothesized that, the domain of Spc105 that is housed within  
176 amino acid 507-638, directly interacts with Kre28. Deletion of this domain abrogates the  
177 interaction resulting in delocalization of Spc105 from the kinetochores.

178 To biochemically confirm the results of the 2-hybrid and localization experiments, we  
179 immunoprecipitated GFP-labeled versions of Spc105 from strains expressing either  
180 Spc105<sup>455::GFP</sup> (FL) or spc105<sup>Δ313-638::GFP</sup> (Δ313-638) and examined if both of these  
181 molecules interact with Kre28 (Figure 2C). Immunoprecipitation followed by immunoblot  
182 analysis demonstrated that even though Spc105<sup>455::GFP</sup> binds Kre28-5xFlag, the mutant  
183 of spc105<sup>Δ313-638::GFP</sup> is unable to do so, which thus indicates that domain harbored  
184 within Spc105<sup>507-638</sup> is essential for its interaction with Kre28 and subsequently its  
185 recruitment at the kinetochores.

186

187 **Truncation of Kre28 disrupts its localization from kinetochore. However, non-**  
188 **localizable mutants of Kre28 support cell viability when over-expressed.**

189 Our yeast two hybrid assay (Figure 2A) indicated that Spc105 interacting domain of  
190 Kre28 lies within amino acid 127-201 of Kre28. The predicted secondary structure of  
191 Kre28<sup>FL</sup> indicated that the aforesaid region of Kre28 is helix rich and structured (Figure  
192 3A, <http://bioinf.cs.ucl.ac.uk/psipred>). To check *in-vivo* which domain of Kre28 is  
193 essential for its loading at the kinetochore and for interaction with Spc105, we created  
194 yeast strains that express GFP fused Kre28 fragments from *ADH1* promoter. We  
195 examined their localization in a diploid yeast strain where one genomic copy of *KRE28*  
196 is deleted and the other allele is tagged with mCherry at its C- terminus (Figure 3B). As  
197 expected, GFP-Kre28<sup>FL</sup> localizes at the kinetochore. On the contrary GFP-kre28<sup>Δ127-183</sup>  
198 or fragments with larger truncations failed to localize at the kinetochores. When they  
199 were over-expressed from pr*ADH1*, cells expressing GFP fused Kre28<sup>FL</sup> and its  
200 truncated versions revealed high cytoplasmic GFP signal (Figure 3B). Therefore, we  
201 performed similar experiments with a chimera wherein the SV40-Nuclear localization  
202 signal (NLS) at the C-termini of GFP-kre28<sup>Δ127-183</sup>. Even in this case, we did not see any

203 kinetochore localization (data not shown) even though the GFP tagged Kre28<sup>FL</sup> or its  
204 truncations were expressed at similar levels (Figure 3C).

205 Does Kre28 delocalization affect the cell viability when yeast cells express the mutants  
206 in absence of wild-type Kre28? To test this, we sporulated these diploid strains and  
207 isolated haploid spores. We observed that the segregants over-expressing truncated  
208 versions of *kre28* were able to rescue deletion of endogenous *KRE28* (*kre28Δ*).  
209 However, the segregants expressing truncated *kre28* molecules from their native  
210 promoter (*KRE28pr*) could not complement genomic *KRE28* deletion (Figure 3D).  
211 These data indicate that full length Kre28 is essential for its binding with Spc105 and for  
212 its interaction with Mtw1 complex. However, overexpressed *kre28* fragments sustain cell  
213 viability even though they do not localize at the kinetochore. We backcrossed these  
214 viable spores with the parent strain (YEF473) to avoid background mutations. The  
215 segregants isolated from those crosses were subjected to further experiments.

216

217 **Truncation mutants of Kre28 do not affect kinetochore biorientation, however**  
218 **they severely affect the recruitment of Spc105.**

219 Among the segregants expressing only the unrecruitable *kre28* mutants, we observed  
220 slower colony growth. The slow growth suggested to us that these mutants may have a  
221 high incidence of chromosome missegregation, which subsequently affects their cell  
222 viability. From these mutants, we chose *kre28*<sup>Δ127-183</sup> for further analysis because it's the  
223 smallest truncation that doesn't localize and that supports cell viability when  
224 overexpressed. To check whether *kre28*<sup>Δ127-183</sup> affects the biorientation of sister  
225 kinetochores, we tagged Ndc80 and Spc105 individually with mCherry and studied  
226 kinetochore biorientation in *kre28* truncation mutant (Figure 4 A and 4 B). We did not  
227 find any discernable defects in bipolar attachment of the metaphase kinetochores in  
228 those mutants when they were grown in normal conditions (Figure S2F). However, we  
229 observed a significant decrease in Spc105 recruitment in the truncation mutants (Figure  
230 4B) whereas change in Ndc80 localization was minimal (Figure 4A).



231 This set of observations were corroborated in the assay where we varied the amount of  
232 either Kre28 or Spc105 per the kinetochores by exploiting variable expression of the  
233 respective protein using the galactose-induced GALL promoter and quantified the  
234 amount of either Spc105 or Kre28 respectively per bioriented kinetochore (Figure 4Ci  
235 and ii). This quantification revealed that the amount of kinetochore localized Kre28 and  
236 Spc105 is mutually correlated. As the number of molecules of either protein increases,  
237 so does the number of molecules of the other. As expected, both numbers saturate at ~  
238 8 molecules per kinetochore, which is close to the maximal number of Ndc80 complex  
239 molecules per yeast kinetochore [28]. Given that Spc105 can localize to kinetochores  
240 even in strains over-expressing Kre28 fragments, these results strongly suggest that  
241 Kre28 positively contributes to Spc105 interactions with the Mtw1 complex. We also  
242 found that the number of Ndc80 molecules per kinetochore was also slightly lower when  
243 in cells with kinetochores containing small numbers of Kre28 molecules per kinetochore  
244 (Figure 4Ciii). This is consistent with our prior work, which showed that reduction in the  
245 number of Spc105 molecules per kinetochore similarly lowers the number of Ndc80  
246 molecules per kinetochore [28].

247 To confirm that  $kre28^{\Delta 128-183}$  cannot interact with Spc105, we performed RFP-trap  
248 experiments followed by immunoblot assay. We observed that the co-precipitation of  
249  $kre28^{\Delta 128-183}$  is significantly reduced (Figure 4D). Moreover, we detected the protein  
250 level of Spc105 is also reduced in presence of  $kre28^{\Delta 128-183}$  (Figure 4D, panel of anti-  
251 DsRed blot). This set of observations imply that Kre28 interacts with Spc105 through  
252 the coiled coil domain of 128-183. They also suggest that Kre28 plays a role the  
253 maintaining the stability of Spc105 protein.

254

255 **Truncation of Kre28 adversely affects spindle checkpoint and error correction**  
256 **pathway and impairs the generation of diploid yeast strains and subsequent**  
257 **meiosis.**

258 As stated previously, Spc105 serves as an interaction hub for checkpoint components  
259 by harboring MELT repeats, phosphorylation substrates of essential spindle assembly  
260 checkpoint (SAC) kinase Mps1, in its unstructured N-terminal domain [16, 17].

261 Moreover, evolutionarily conserved RVSF motif present in N-terminus of Spc105 acts as  
262 primary binding motif of protein phosphatase I (PP1) that dephosphorylates the MELT  
263 repeats to silence the SAC [19]. Therefore, Spc105 delocalization may affect SAC  
264 activation and silencing.

265 We studied SAC signaling in cells expressing  $kre28^{\Delta 128-183}$  by treating cell cultures with  
266 the microtubule poison nocodazole and performing flow cytometry to quantify cellular  
267 DNA content. The flow cytometry revealed that SAC strength was not discernably  
268 different in strains expressing  $Kre28^{FL}$  and  $kre28^{\Delta 127-183}$ , as indicated by the arrest of the  
269 cell population with 2N ploidy (Figure 5A). However, we have previously shown that this  
270 assay cannot detect smaller defects in SAC signaling [24]. To examine the efficacy of  
271 the error correction process in  $Kre28$  mutants, we subjected them strain to a low dose of  
272 another microtubule poison, benomyl. At its dosage used in this assay, benomyl  
273 destabilizes microtubules and therefore forces yeast cells to rely on a combination of  
274 effective error correction and SAC signaling to ensure chromosome biorientation and  
275 accurate chromosome segregation [24]. The strains that express  $kre28$  with larger  
276 truncations ( $\Delta 127-201$ ,  $\Delta 1-201$  and  $\Delta 1-126$ ), demonstrated growth defects even in non-  
277 selective growth media (YPD). We also performed benomyl sensitivity test using a strain  
278 where SV40-NLS is fused to  $kre28^{127-183}$  at the C-terminus. That also did not alleviate  
279 the effect of  $kre28$  truncation, suggesting that these phenotypes are not caused by  
280 delocalization of  $kre28$  from nucleus (Figure 5B bottom). The growth defects of the  
281  $kre28$  truncation mutants in benomyl-containing media strongly imply that their ability to  
282 activate a robust SAC and/or error correction pathway is compromised. Reduced  
283 Spc105 loading in the kinetochore of these mutants can explain the observed  
284 deficiencies in activation of SAC and error correction.

285 Previous studies showed that the spindle assembly checkpoint is essential to ensure  
286 the fidelity of meiotic segregation [29, 30]. Therefore, delocalization of  $kre28$  may also  
287 results in defects in meiotic processes. To examine this aspect, we produced zygotes  
288 by crossing  $a$  and  $\alpha$  haploid strains that does not house any wild-type  $Kre28$  protein and  
289 over-express truncated  $kre28$ . However, these zygotes had severe growth defects  
290 ( $kre28^{\Delta 127-201}/kre28^{\Delta 127-201}$ ) (Figure 5C). We did not detect any defects in nuclear fusion

291 during mating of these haploid cells (data not shown). Furthermore, when we sporulated  
292 these slow growing homozygous diploid cells expressing truncated kre28 (as shown in  
293 one of the panels of homozygosis in Figure 5C) and dissected tetrads, we observed a  
294 significant decrease in the number of viable segregants (Figure 5D, right panel). In  
295 control experiments, we did not observe any defects in heterozygous diploid formation  
296 (Figure 5C, left panel) or in the growth of viable segregants after subsequent sporulation  
297 (Figure 5D, left panel). We have tabulated our observations for the truncation mutants of  
298 Kre28, which we constructed for this study (Table 1). The observation of non-localizable  
299 kre28 affecting meiosis in yeast is consistent with observations previously obtained from  
300 mice oocyte meiosis [31].

301

## 302 Discussion

303 Here we have elucidated how Spc105 and Kre28 are localized and aligned in the  
304 microtubule attachment sites of the bioriented kinetochores of budding yeast cells.  
305 Kre28-C localizes approximately 48 nm away from N-termini of Ndc80. This is  
306 consistent with observations reported previously with Zwint1, human orthologue of  
307 Kre28 [21]. Our FRET data are also in accordance with previously published  
308 biochemical and cell biological studies [13, 14, 21]. Interestingly, we could not  
309 determine the FRET between Kre28-C and components of Mtw1 complex, because  
310 strains expressing the fluorescent fusions were inviable. The fluorescent tags most  
311 likely disrupt interactions between Spc105/Kre28 and the Mtw1 complex, which results  
312 in synthetic lethality [13].

313 Results of the yeast two hybrid assays involving Kre28<sup>FL</sup> and Spc105<sup>455-709</sup> was  
314 consistent with previously published data from Yanagida lab [14, 25]. However, it was  
315 not clear why yeast two hybrid assay did not work between Kre28<sup>FL</sup> and spc105<sup>455-917</sup>  
316 (spc105<sup>SMD+RWD</sup>). It may be case that SMD+RWD (Spc105<sup>455-917</sup>) fusion with GAL4  
317 binding domain (GBD\_C1) did not fold in a way that they can interact with Kre28. On the  
318 other hand, it is also possible that RWD interfering with dimerization of SMD and Kre28  
319 has an unknown physiological significance. Although we obtained yeast two hybrid  
320 interaction between kre28<sup>1-201</sup> and spc105<sup>455-709</sup>, we did not observe any kinetochore

321 loading of kre28<sup>1-201</sup>. It was also not sufficient to support cell viability in absence of wild-  
322 type Kre28. Much to our surprise, even after taking the data of Herzog lab into  
323 consideration, when we maintained the two binding sites of Spc105 (kre28<sup>128-169</sup> and  
324 kre28<sup>229-259</sup>) in our kre28 cassette (kre28<sup>Δ1-126</sup>) [13], we did not see any kinetochore  
325 localization. After considering these data we can conclude that full length Kre28 is  
326 essential for its localization and for full kinetochore recruitment of Spc105.

327 Our data of Spc105 protein becoming destabilized in the kre28<sup>Δ127-183</sup> mutant (Figure  
328 4D, panel of anti-DsRed blot) implies that impairment of Kre28-Spc105 interaction  
329 significantly affects Spc105 integrity or expression. This implication is in accordance  
330 with previously reported study by Zhang and colleagues, where they depleted Zwint1 by  
331 RNAi and demonstrated that the cellular protein level of hSpc105 is depleted [32]. Study  
332 in fission yeast *S. pombe* also revealed that kinetochore proteins like Spc105 is  
333 surveilled by protein quality control machinery that includes Hsp70, Bag102, the 26S  
334 proteasome, Ubc4 and the ubiquitin-ligases Ubr11 and San1 [33]. In that study, the  
335 authors suggested that cells employ this mechanism to maintain homeostasis of nuclear  
336 components and genomic integrity. We came across another indirect evidence of  
337 protein quality regulation of Spc105 and Kre28 from Yong-Gonzales and colleagues,  
338 who showed that both of these proteins become sumoylated by Smc5-Smc6 complex  
339 and deleterious mutations in Smc5-Smc6 complex leads to chromosome loss [34].  
340 Consistent with the above mentioned studies, the Biggins lab also discovered  
341 Mub1/Ubr2 ubiquitin ligase complex to be a part of a quality control mechanism that  
342 monitors kinetochore protein Dsn1 [35]. A similar mechanism likely controls Spc105  
343 and/or Kre28 levels in *S. cerevisiae*.

344 Does Kre28 act as a chaperon to stabilize the recruitment of Spc105 at the  
345 kinetochore? Some of the previous studies argue against this hypothesis. In human  
346 kinetochore, Zwint1 is dispensable for the interaction between hSpc105 and Mis12  
347 complex [14, 15]. While performing ex-vivo kinetochore assembly experiments, Biggins  
348 lab showed that Ipl1 phosphorylation of Dsn1 which triggers outer-kinetochore  
349 assembly, also recruits Kre28, which should be specific to mitotic cells [36].  
350 Contrastingly, we observed similar level of Kre28 at the kinetochores at every stage in

351 cell cycle including G1-S phase (unbudded and small budded cells, data not shown)  
352 which implies that Kre28 loading at the kinetochore takes place at the same time point  
353 as loading of Spc105. Combining our observations with those from Herzog lab, we can  
354 conclude that *kre28*<sup>127-183</sup> contributes to main interaction between Kre28 and Spc105  
355 and *kre28*<sup>229-259</sup> contributes to interaction with Mtw1 complex. However, full length  
356 protein of Kre28 is essential for proper binding with Spc105, their mutual recruitment  
357 and their activity at the kinetochores. Kre28 also may become phosphorylated by Ipl1  
358 that in turn can trigger its association with Spc105 and subsequently their loading at the  
359 kinetochores.

360 Does Kre28 have specific function in spindle assembly checkpoint and error correction  
361 or in meiosis? The results of the functional assays (Figure 5) clearly show that  
362 delocalization of Kre28 from the kinetochore impairs the afore-mentioned processes.  
363 However, all these phenotypes may be linked with the delocalization of Spc105. We  
364 also came across the same issue with Zwint1 [21, 32, 37]. Our experiment where we  
365 observed significant number of inviable segregants after sporulation of homozygous  
366 diploid strains expressing only non-localizable *kre28* (*kre28*<sup>Δ128-183</sup>), are also in  
367 agreement with a study done by Dong Woo Seo and colleagues [31]. According to that  
368 study, Zwint1 depletion results in erroneous chromosome alignment and high frequency  
369 of aneuploidy during mice oocyte meiosis. Our study suggests that this function of  
370 Zwint1 is also conserved in yeast Kre28.

371

## 372 **Materials and methods**

### 373 **Plasmid and Strain construction**

374 The strains and plasmids utilized in this study are documented in table 2 and 3  
375 respectively. Yeast strains containing multiple genetic modifications were constructed  
376 by standard yeast genetic techniques. GFP (S65T) and mCherry fusion of proteins were  
377 used to localize kinetochores by fluorescence microscopy. The C- terminal tags like  
378 GFP, mCherry, 3xHA and gene deletion cassettes like *spc105Δ::NAT* and *kre28Δ::NAT*  
379 were introduced at the endogenous locus through homologous recombination of PCR

380 amplicons [38]. A 7-amino-acid linker (sequence: 'RIPGLIN') bridges the tags (GFP,  
381 mCherry or 3HA) from the C-termini of the tagged-proteins. Earlier we observed that the  
382 intensity of mCherry-tagged kinetochore proteins varies significantly from one  
383 transformant to another for the same strain, due to inherent variability of the mCherry  
384 brightness. Therefore, to construct all the FRET strains with Ndc80, Stu2, Nsl1, Kre28  
385 and Ask1-mCherry, we crossed a specific mCherry strain with haploid strains of all GFP  
386 fused Spc105 alleles and sporulated the heterozygous diploids to obtain the desired  
387 segregants.

388 To construct the yeast strains with internally tagged Spc105 mentioned in Figure S1,  
389 and the strains with truncated Spc105 mentioned in Figure 3, first we used *BstEII* digest  
390 of pRS305 chimera or *StuI* digest of pRS306 chimera of Spc105-GFP fusion alleles to  
391 transform AJY3278 (*SPC105* $\Delta$ ::*NAT*) that was later sporulated to obtain the haploid  
392 segregants expressing only GFP fusion copy of Spc105. To construct some these  
393 strains first we deleted the genomic copy of *SPC105* in a strain already supplemented  
394 with the wild-type *SPC105* gene expressed from centromeric plasmid yCP50 (*URA3*).  
395 Then the pRS315 chimera containing Spc105-GFP alleles were transformed in that  
396 strain. After that, the strains expressing only Spc105-GFP alleles were generated by  
397 negative selection for yCP50 on 5-FOA plates.

398 The construction of chimeras for overexpression of Kre28<sup>FL</sup> or truncations was achieved  
399 by cloning N-terminal GFP tagged fusions of Kre28 in a centromeric plasmid pRS414,  
400 where *KRE28* ORF is flanked by *ADH1* (Alcohol Dehydrogenase 1) promoter and *GFP*  
401 ORF at the upstream and *CYC* (Cytochrome C) terminator at the downstream (obtained  
402 from Dr. Mara Duncan's lab, department of Cell and Developmental Biology, University  
403 of Michigan). Kre28 fragments were cloned in *Bam*HI- *Pst*I sites. SV40-Nuclear  
404 localization signal (NLS) was cloned within *Pst*I- *Sal*I. For wild-type expression, Kre28<sup>FL</sup>  
405 and its truncations were cloned in *Bam*HI- *Pst*I of a pRS305 plasmid. They were  
406 expressed as N-terminal GFP tagged fusions by its own promoter and terminator. *BstEII*  
407 digests of these chimeras are transformed in AJY3298 (*kre28* $\Delta$ ::*NAT/KRE28*-mCherry-  
408 Hyg) to check for their localization. To create diploid zygotes, two strains of *a* and  *$\alpha$*   
409 mating types are mixed with each other and spotted on YPD plate which was incubated



410 for 3-4 hours at 30°C. To induce sporulation, diploid yeast cells were grown in YPD  
411 overnight to stationary phase. Next day cells were pelleted down and resuspended with  
412 starvation media (0.1% yeast extract, 1% potassium acetate, 0.025% dextrose) and  
413 incubated 4-5 days at RT.

#### 414 **Yeast two hybrid assay**

415 We performed yeast two hybrid experiments by co-transforming both of prey  
416 (pGAD\_C1) and bait (pGBD\_C1) chimera in strain AJY3802 (PJ69A) [39]. Then we  
417 streaked two of the transformants for each prey-bait pair on synthetic dextrose plates of  
418 histidine dropout (-HIS) and dropout of histidine and adenine (-HIS-ADE). Plates were  
419 incubated in 32°C for at least 3 days.

#### 420 **Benomyl sensitivity assay**

421 This experiment was performed as described previously [24, 27]. Starting from 0.1  
422 OD<sub>600</sub> of log phase cultures, we prepared 10-fold serial dilutions and frogged or spotted  
423 them on YPD and YPD containing 20 µg/ml and 30 µg/ml benomyl. At least two  
424 biological replicates were used, and spotting were repeated twice for each set of  
425 experiments. The plates were incubated at 32 °C and pictures were taken after 2 (YPD)  
426 to 3 (YPD+Benomyl) days. For space limitations, we showed only YPD+Ben<sup>30</sup> plates.  
427 For all spotting assays with benomyl, we used YEF473 or strain expressing  
428 Spc105<sup>222::GFP</sup> as wide-type (positive control) and *mad2Δ* or *sgo1Δ* as negative controls.  
429 Before spotting, we grew the strains expressing truncated kre28 or Kre28<sup>FL</sup> control in  
430 synthetic dextrose media (Sd-Trp) without Tryptophan to culture only cells carrying the  
431 pRS414 chimera. As shown in the plate images, we also used strains expressing  
432 Kre28<sup>FL</sup>-mCherry along with truncated kre28 as controls which did not show any  
433 discernable difference in growth, compared to wild-type.

#### 434 **Microscopy and image acquisition and analyses**

435 A Nikon Ti-E inverted microscope with a 1.4 NA, 100X, oil-immersion objective was  
436 used for experiments mentioned in the paper [40]. A ten-plane Z-stack was acquired  
437 (200nm separation between adjacent planes). To measure Ndc80 and Spc105-  
438 mCherry, an extra 1.5x opto-var lens was used. We measured total fluorescence of

439 kinetochore clusters (16 kinetochores in metaphase) by integrating the intensities over a  
440 6x6 region centered on the maximum intensity pixel. We used median intensity of pixels  
441 immediately surrounding the 6x6 area to correct for background fluorescence. The  
442 calculation was performed using semi-automated MATLAB programs as described  
443 earlier [41]. FRET, high-resolution co-localization, fluorescence distribution analyses  
444 and analyses of the images were performed as previously described [6, 28, 40, 42, 43].  
445 While measuring proximity ratio, we considered any value below 0.10 as no FRET  
446 (mean of the data marked as black), range between 0.10 and 0.3 as medium to low  
447 FRET (average of the data marked as red) and any values above 0.3 as high FRET  
448 (mean of the data marked as red).

#### 449 **Titration of Kre28 and Spc105 proteins levels and quantification of Kre28, Spc105** 450 **and Ndc80 intensities**

451 We grew the strains with prGALL-SPC105 or prGALL-KRE28 in presence of raffinose  
452 (2%). On the day of the assay, we supplemented the media with variable amounts of  
453 galactose as discussed previously (2%, 1.5%, 0.5%, 0.2%, 0.1% and 0.05%) [28]. We  
454 determined the number of Kre28, Spc105 and Ndc80 from their intensities as reported  
455 previously [28]. We first deduced the fluorescence intensities of Kre28-mCherry, Ndc80-  
456 GFP and Spc105-GFP from bioriented kinetochores. We used AJY939 (Ndc80-GFP,  
457 Spc25-mCherry) as a reference to obtain the intensities for known number of Ndc80  
458 and Spc25 molecules at the bioriented kinetochores. AJY939 was cultured under same  
459 imaging conditions as the experimental strains, and the calibration data was acquired  
460 throughout the duration of this study. This calibration accounted for alteration in the  
461 microscope and imaging technique set up over time. We used the values of Ndc80-GFP  
462 and Spc25-mcherry to determine the number of molecules of Spc105-GFP and Kre28-  
463 mCherry that were loaded in the bioriented kinetochores.

#### 464 **Preparation of cell lysates and western blot assay**

465 To prepare cell lysates, log-phase cells ( $OD_{600}$  2.0) were pelleted, resuspended in  
466 sample buffer (2% SDS, 1% 2-mercaptoethanol), boiled, and lysed by glass-bead  
467 mechanical disruption [6]. The lysates were collected after centrifugation. After  
468 separating the proteins by 10% SDS-PAGE, samples were transferred to nitrocellulose

469 or PVDF blocked with 5% skimmed milk in TBS-T (137 mM NaCl, 15.2 mM Tris-HCl,  
470 4.54 mM Tris, 0.896 mM Tween 20), and then probed with primary and fluorescent  
471 secondary antibodies. Mouse  $\alpha$ -GFP antibody was from Santa Cruz Biotechnology  
472 (1:2000, GFP(B-2):sc-9996). Peroxidase conjugated  $\alpha$ -mouse IgG (1:5000; Sigma, A-  
473 4416) treated with ECL (Thermo scientific) was used to develop the western blot.

#### 474 **GFP-trap and RFP-trap assay to pull down Spc105 and immune blot**

475 We used AJY6273 and AJY6274 for GFP-trap experiments. As mentioned in the strain  
476 list, AJY6273 expresses Spc105<sup>455::GFP</sup> from a centromeric plasmid (pRS315) and  
477 genomic *SPC105* allele is deleted. The truncation of 313-638 affects the cell viability,  
478 hence in AJY6374, the genomic *SPC105* allele was intact and spc105 <sup>$\Delta$ 313-638</sup> was  
479 expressed from a centromeric plasmid (pRS315). We grew both the strains in synthetic  
480 dextrose media devoid of Leucine (SD-LEU) to maintain the centromeric plasmid before  
481 harvesting them for cell lysis. For RFP-trap assays we used AJY3483 and AJY3484  
482 (See strain list for detailed information on their genotypes). We grew the strains in SD-  
483 TRP (Synthetic dextrose devoid of Tryptophan) media till late log-phase before  
484 harvesting the cells. We lysed the cells by glass-beads in presence of buffer H 0.15 (25  
485 mM HEPES of pH 8.0, 2.0 mM MgCl<sub>2</sub>, 0.1 mM EDTA of pH 8.0, 0.5 mM EGTA-KOH of  
486 pH 8.0, 15% Glycerol, 0.1% IGEPAL-CA-630, 150 mM KCl), supplemented with 0.2 mM  
487 PMSF, protease inhibitor cocktail and phosphatase inhibitor cocktails [44]. We isolated  
488 clear lysates of the strains and from there, we incubated equal amount of lysates with  
489 pre-equilibrated beads of GFP-trap (Chromotex, gta-20) or RFP-Trap (Chromotek, rta-  
490 20) overnight. Next day, we washed the beads with post IP wash buffer (composition as  
491 mentioned above) with and without 2mM Dithiothreitol (DTT), before boiling them in  
492 presence of 1xSDS loading buffer.

493 After subjecting the proteins through SDS-PAGE, we transferred them to nitrocellulose  
494 membrane which we blocked with 5% skimmed milk in 1x phosphate buffered saline-  
495 Tween (PBS-T, 137 mM NaCl, 10 mM phosphate, 2.7 mM KCl, 0.05% Tween 20). We  
496 probed the blot with Mouse anti-GFP (JL8, Living Colors, Takara, 1:3000) or Mouse anti  
497 Ds-Red (Santa Cruz Biotechnology, sc-390909, 1:2000), Mouse  $\alpha$ -Flag M2 (Sigma-

498 Aldrich, 1:5,000) and HRP conjugated secondary anti-Mouse (Sigma aldrich, 1:10000).  
499 ECL (Thermo scientific) treatment was used to develop the western blot.

## 500 **Flow cytometry**

501 We performed flow cytometry as described previously [24, 27]. For strains expressing  
502 Kre28\_FL or truncated kre28, we started with overnight inoculums grown in Sd-Trp and  
503 shifted to YPD to grow till early to mid-log phase before supplementing the media with  
504 Nocodazole (final concentration 15µg/ml) or DMSO control. We collected cell samples  
505 at 0, 1, 2, 3-hour post drug treatment and fixed them with 70% ethanol before storing  
506 them at 4°C overnight. Next day, after removing the Ethanol, treated the samples with  
507 bovine pancreatic RNase (Millipore Sigma, final concentration 170 ng/ml) at 37°C for 6  
508 h-overnight in RNase buffer (10 mM Tris pH8.0, 15 mM NaCl). After that, we removed  
509 the RNase and resuspended the cells in 1x PBS. We treated the samples with  
510 propidium iodide (Millipore Sigma, final concentration 5 mg/ml in PBS) for at least 1 h at  
511 room temperature before analyzing them using the LSR Fortessa machine (BD  
512 Biosciences) in Biomedical research core facility, University of Michigan medical school.  
513 We analyzed and organized the data using FlowJo software (FlowJo\_V10.7.1\_CL).

## 514 **Nuclear localization signal (NLS) mapping**

515 We performed NLS mapping by pasting the amino acid sequences of Spc105 and  
516 Kre28 in the website of [http://nls-mapper.iab.keio.ac.jp/cgi-bin/NLS Mapper\\_form.cgi](http://nls-mapper.iab.keio.ac.jp/cgi-bin/NLS Mapper_form.cgi)  
517 and keeping the cut off score to 5.0 [45, 46]. It scored SV40-NLS (TPPKKKRKVA,  
518 monopartite) as 15.5. We observed score of 9.0 (monopartite) for Spc105<sup>337-345</sup>  
519 (SSNKRRKLD) and 6.9 (bipartite) for Spc105<sup>599-625</sup>  
520 (NTLKREYEKLNREEVEKVN SIRGKIRKL). We did not find any NLS for Kre28 without  
521 setting the cut-off score to 4.0. Kre28<sup>207-234</sup> and Kre28<sup>286-317</sup> displayed NLS scores of 4.2  
522 and 4.0 (bipartite) respectively.

## 523 **Statistical analysis**

524 We analyzed the data and assembled the graphs by Graphpad Prism 8 software. We  
525 performed unpaired t-test and one-way anova analyses to check the statistical  
526 significances of the data. The p-values are mentioned on the top of the graph.

527  
528  
529  
530  
531  
532  
533  
534  
535  
536  
537  
538

539 **Table1: Summary of observations of the experiments involving kre28 truncations.**

| Kre28 constructs                | Y2H interaction with Spc105 <sup>455-709</sup> | Localization at the kinetochore when over-expressed | Sufficiency for cell viability when over-expressed | Localization at the kinetochore when expressed from <i>KRE28</i> promoter | Sufficiency for cell viability when expressed from <i>KRE28</i> promoter | Sensitivity to Benomyl | Vegetative growth after homozygous mating | Meiosis at homozygous mating |
|---------------------------------|------------------------------------------------|-----------------------------------------------------|----------------------------------------------------|---------------------------------------------------------------------------|--------------------------------------------------------------------------|------------------------|-------------------------------------------|------------------------------|
| Full Length (FL)                | Yes ( <i>HIS3</i> )                            | Yes                                                 | Yes                                                | Yes                                                                       | Yes                                                                      | No                     | Normal                                    | Normal                       |
| Δ202-385 (with NLS)             | Yes ( <i>HIS3</i> )                            | No                                                  | No                                                 | Not done                                                                  | Not done                                                                 | Technically unfeasible | Technically unfeasible                    | Technical unfeasible         |
| Δ1-201                          | No                                             | No                                                  | Yes                                                | No                                                                        | No                                                                       | Yes                    | Impaired                                  | Impaired                     |
| Δ127-183 (with and without NLS) | Not done                                       | No                                                  | Yes                                                | No                                                                        | No                                                                       | Yes                    | Impaired                                  | Impaired                     |
| Δ127-201                        | Not done                                       | No                                                  | Yes                                                | Not done                                                                  | Not done                                                                 | Yes                    | Impaired                                  | Impaired                     |
| Δ1-126                          | Not done                                       | No                                                  | Yes                                                | No                                                                        | No                                                                       | Yes                    | Not done                                  | Not done                     |

540  
541  
542

543 **Figures:**

544

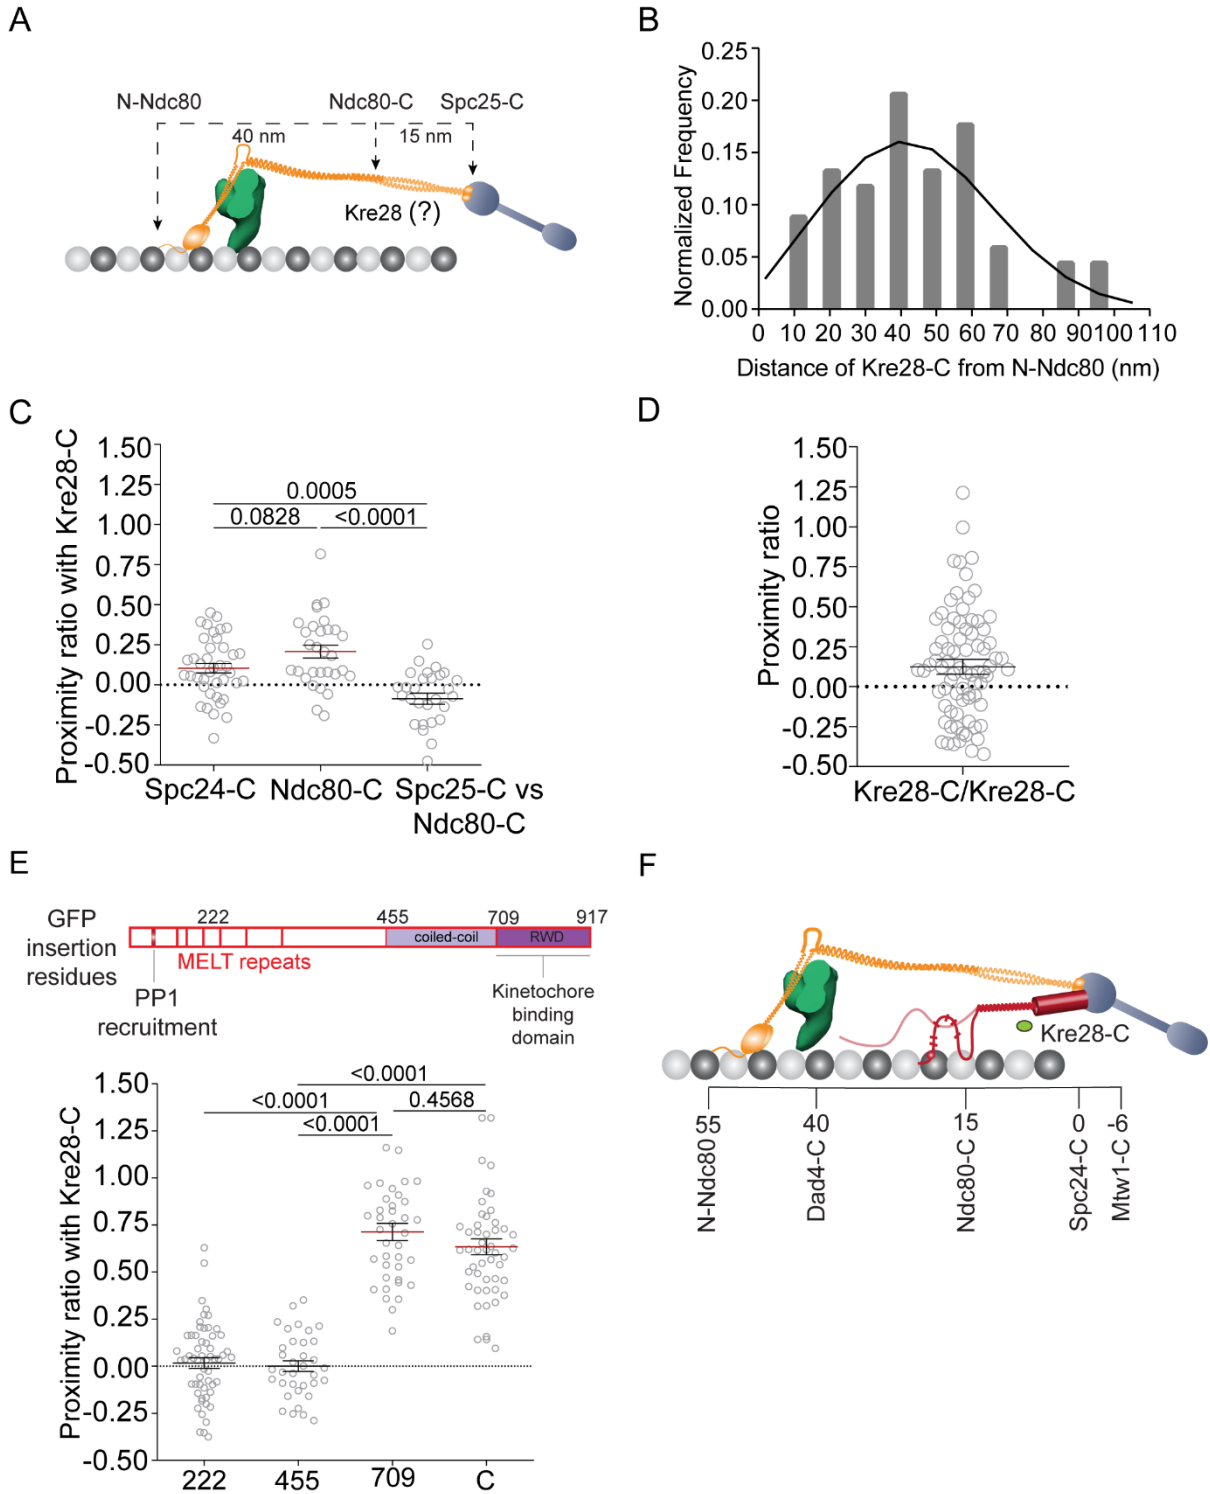

545



546 **Figure 1. C-termini of Kre28 is localized in the proximity of structured C terminal**  
547 **domains of Spc105. (A)** The organization of kinetochore proteins in a metaphase  
548 kinetochore of yeast along the microtubule axis. Positions of C termini of Spc25/Spc24,  
549 Ndc80/Nuf2 and N termini of Ndc80 are shown. **(B)** Frequency distribution of the  
550 distance between the centroids of Kre28-mCherry (Kre28-C) and GFP-Ndc80 (N-  
551 Ndc80). Black curve line is the non-Gaussian maximum likelihood fit. **(C)** Proximity ratio  
552 between Spc24-C or Ndc80-C versus Kre28-C (mean $\pm$ s.e.m) in metaphase  
553 kinetochores. At least 29 bioriented kinetochores were analyzed for this data set. The p-  
554 values obtained from unpaired t-tests are mentioned above the plot. **(D)** Proximity ratio  
555 among C termini of Kre28 in metaphase. 82 kinetochores were analyzed to obtain this  
556 data. **(E)** Top: Line diagram of Spc105 molecule. The illustration was duplicated from  
557 our previous study [24]. Red bars represent PP1/Glc7 recruitment site (amino acid 75-  
558 79), and six MELT repeats. Amino acid locations of GFP fusion are shown at the top on  
559 amino acid residues 222, 455, 709 and C (917). Bottom: Proximity ratio between Kre28-  
560 C and different amino acid positions of Spc105 molecules in bi-oriented kinetochores. At  
561 least 35 kinetochore foci were analyzed for this graph. The p-values obtained from one-  
562 way anova test performed on the data are mentioned above the plot. **(F)** Localization of  
563 C termini of Kre28 in KMN network of metaphase kinetochores of yeast cells.

564

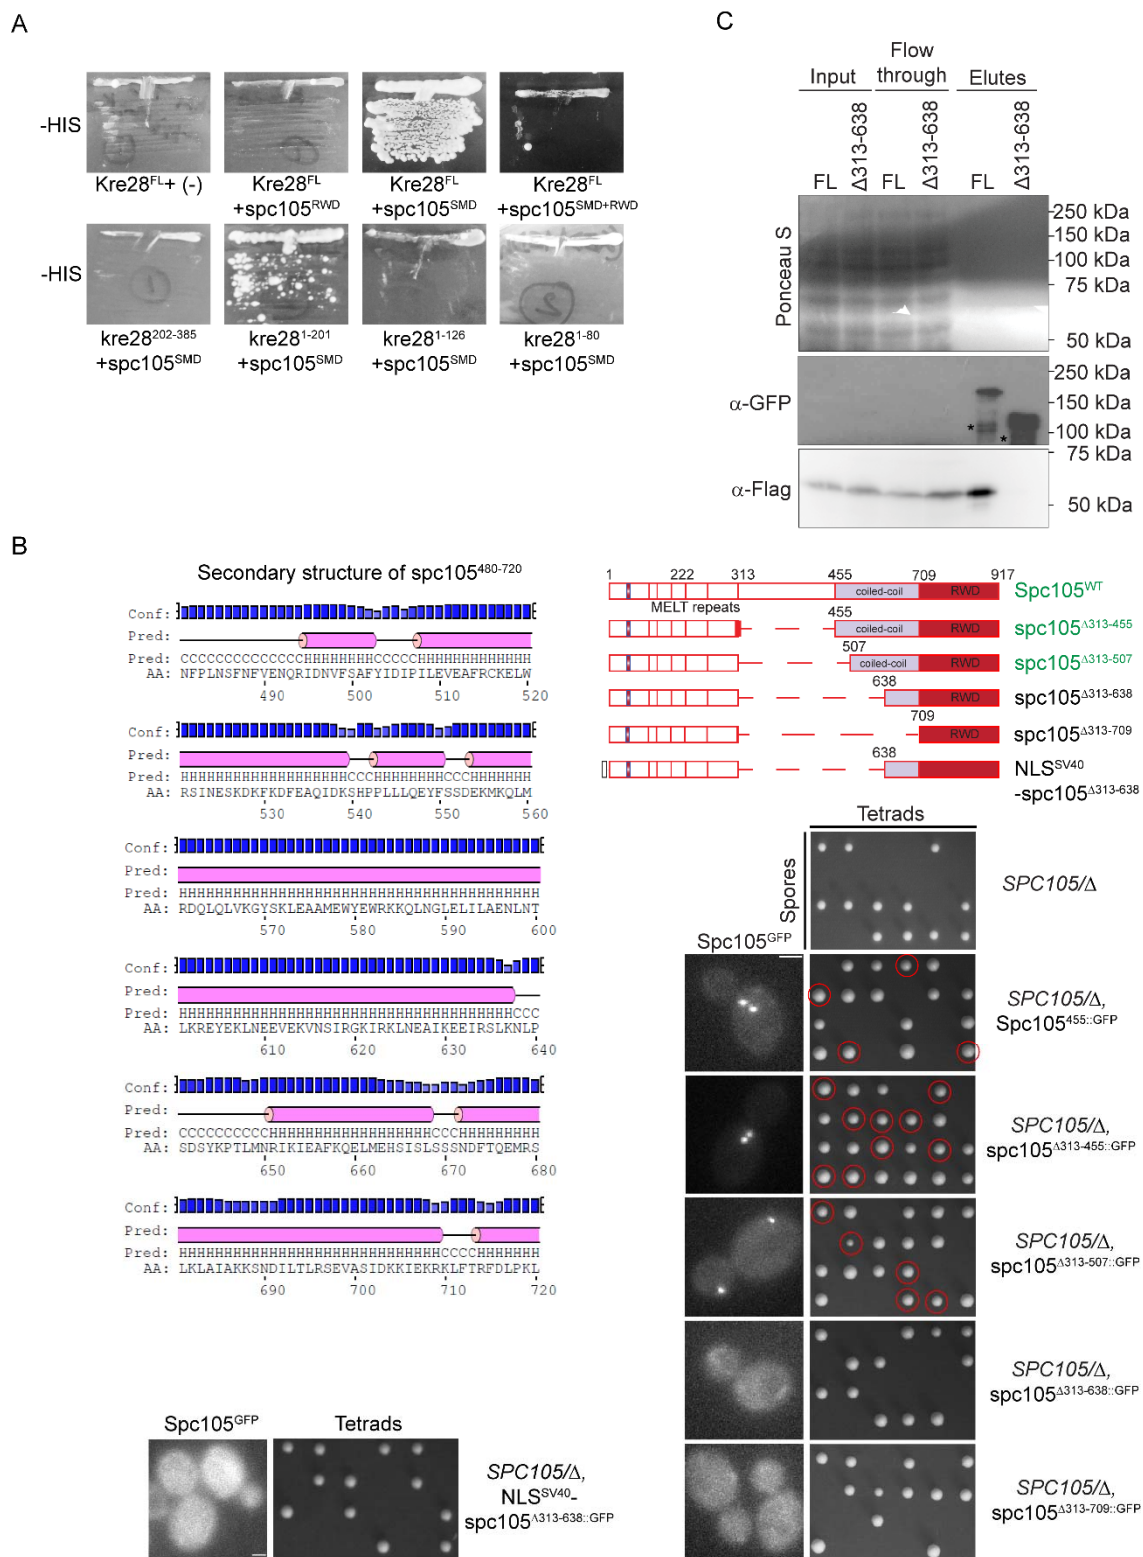

565

566 Figure 2. Kre28 N terminus interacts with the helix rich mid strand region of  
 567 Spc105. (A) Yeast two hybrid assay between Kre28 and structured middle domain

568 (SMD, Spc105<sup>455-709</sup>) or RWD (kinetochore binding domain, Spc105<sup>709-915</sup>). The plate  
569 pictures of synthetic dextrose with histidine dropouts (-HIS) are shown (medium  
570 stringent interaction). No growth was observed on plates of adenine dropout (-ADE,  
571 high stringent interaction, data not shown). Kre28<sup>FL</sup> and other kre28 fragments were  
572 fused to Gal4 activation domain (GAD, Prey). RWD and SMD fragments of Spc105  
573 were fused to Gal4 binding domain (GBD, Bait). Swapping the fragments between GAD  
574 and GBD exhibited background growth with kre28<sup>1-80</sup> fragment on -ADE plates. For  
575 controls, please check Figure S2E. **(B)** Top left: spc105<sup>480-720</sup> harbors SMD (spc105<sup>455-</sup>  
576 <sup>709</sup>). a helix rich domain as predicted by <http://bioinf.cs.ucl.ac.uk/psipred>. Bottom left and  
577 right: Domain mapping of Spc105 mid strand unstructured and helical region. (Top  
578 right): Line diagrams of full length Spc105 and the truncations of middle domain.  
579 (Bottom right and left): Images of heterozygous diploid strains expressing GFP labelled  
580 Spc105 (Wild-type or truncated mutants, genotypes of strains mentioned on the right.  
581 For detailed genotype please check Table 2) and tetrad dissection plates of the diploid  
582 strains expressing full length or truncated version of Spc105. The genotypes are  
583 mentioned on the left of every designated panel. Segregants where genomic *SPC105* is  
584 deleted and express truncated version of Spc105 are marked with red circles. **(C)**  
585 Interaction analysis of Kre28-5xFlag with Spc105<sup>455::GFP</sup> (FL) or spc105<sup>Δ313-638::GFP</sup>  
586 (Δ313-638) expressed in haploid yeast strains. GFP-Trap assay followed by western  
587 blot analysis with anti-GFP and anti-Flag antibodies on the cell lysates, flow through and  
588 the elutes of indicated strains. Ponceau S staining of the blot are shown as a loading  
589 control. Molecular weights of Spc105<sup>455::GFP</sup>, spc105<sup>Δ313-638::GFP</sup> and Kre28-5xFlag are  
590 ~132 kDa, 93.38 kDa and ~53 kDa respectively. Spc105 runs between 150 and 250  
591 kDa in a 10% polyacrylamide gel. Due to low expression, we could not detect Spc105 in  
592 the Input samples. In the elute samples of both the strains, we observed some bands  
593 with lower molecular weight, indicating there may be some degradation of GFP labeled  
594 Spc105.

595

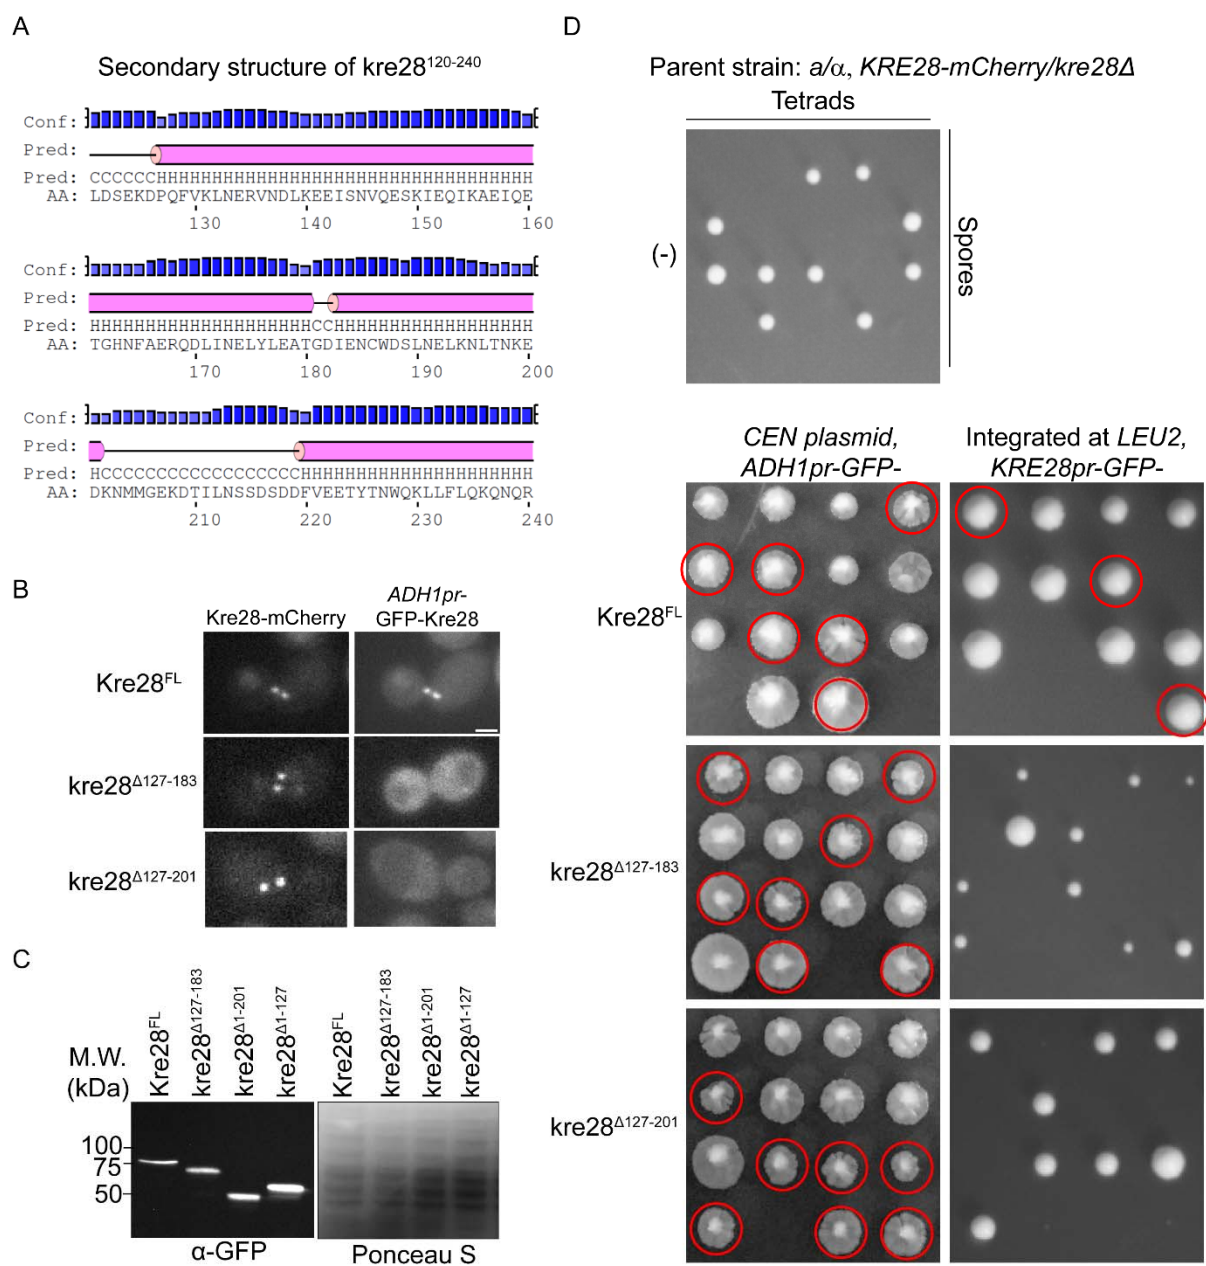

596

597 **Figure 3. Truncation of Kre28 abolishes its localization from kinetochore.**  
598 **However, non-localizable truncations of Kre28 are sufficient for cell viability when**  
599 **they are over-expressed.** (A) *kre28*<sup>127-201</sup> is a helix rich structured domain as  
600 predicted by <http://bioinf.cs.ucl.ac.uk/psipred>. (B) *Kre28*<sup>FL</sup> and its truncated versions  
601 (*kre28*<sup>Δ127-183</sup> or *kre28*<sup>Δ127-201</sup>) were cloned individually in a centromeric plasmid where  
602 they were expressed by *ADH1* promoter as GFP fusion proteins. They were individually  
603 transformed in a heterozygous diploid strain of *Kre28-mCherry/kre28Δ::NAT*.  
604 Representative GFP images of this strain with kinetochore localized *Kre28-mCherry* and

605 GFP fused Kre28<sup>FL</sup> or kre28 truncations are shown. Cells with high copy of these  
606 molecules showed high amount of GFP fluorescence all over the cells although only  
607 Kre28<sup>FL</sup> exhibited kinetochore localization. (C) Western blot assay with anti-GFP  
608 antibody on the lysates of the strains expressing Kre28<sup>FL</sup> or its truncated version from  
609 *ADH1* promoter (*ADH1pr*, over-expression) or its native promoter (*KRE28pr*, expression  
610 from *LEU2* locus). Image of Ponceau S stained blot is shown as loading control.  
611 Molecular weight of GFP-Kre28<sup>FL</sup>: 73.67 kDa, GFP-Kre28<sup>Δ127-183</sup>: 67.33 kDa, GFP-  
612 Kre28<sup>Δ1-201</sup>: 50.6kDa, GFP-Kre28<sup>Δ1-127</sup>: 59.36 kDa. (D) Images of tetrad dissection of the  
613 heterozygous diploid strain of Kre28-mCherry/*kre28Δ* expressing Kre28<sup>FL</sup> or its  
614 truncated versions from *ADH1pr* or *KRE28pr* are shown. Top panel: Tetrad dissections  
615 of Kre28-mCherry/*kre28Δ* revealed two inviable spores out of four, and both of the  
616 viable spores were negative for *kre28Δ*. This inferred that Kre28 is essential for viability  
617 as proven in previous literatures [11]. Tetrads of diploid expressing Kre28<sup>FL</sup> from  
618 *ADH1pr* of centromeric plasmid or from native promoter, integrated at *LEU2* locus  
619 formed at least three viable spores after sporulation. Truncated kre28 (*kre28*<sup>Δ127-183</sup> and  
620 *kre28*<sup>Δ127-201</sup>) expressed from *ADH1pr* also gave rise to at least three viable spores  
621 which indicated that the truncated kre28 can complement *kre28Δ* when they are over-  
622 expressed (left panel). However, they are unable to do the same when they are  
623 expressed from their native promoter (right panel). The segregants with *kre28Δ*  
624 expressing kre28 truncations are marked with red circles.

625

626

627

628



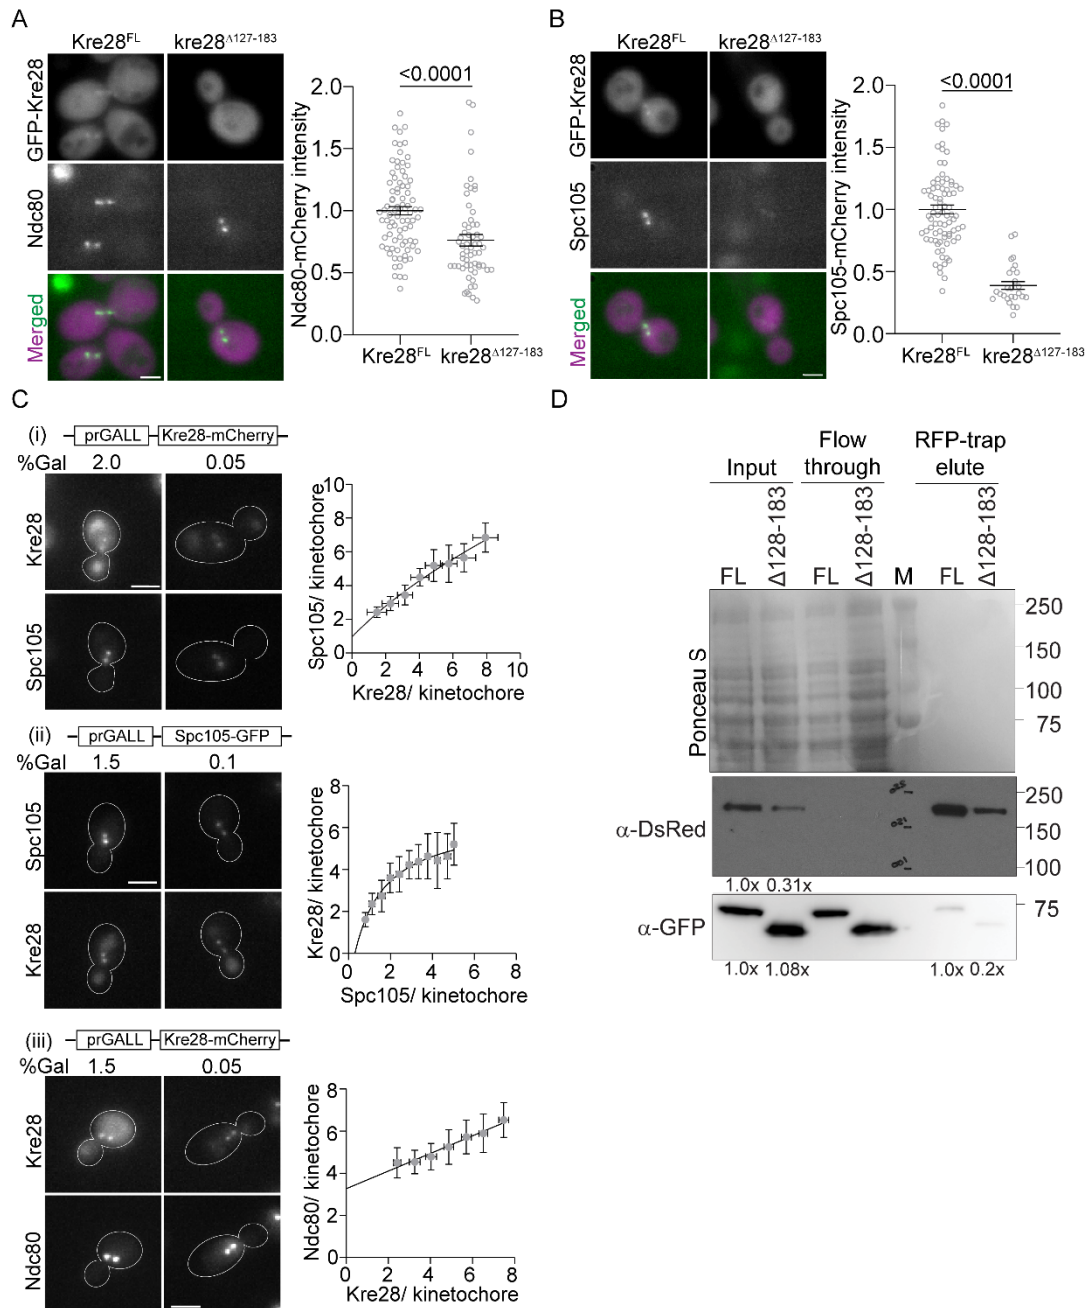

629

630 **Figure 4. Kinetochores with truncated kre28 form bipolar attachments with spindle**  
 631 **microtubules, although recruitment of Spc105 is highly impaired. (A) Left:**  
 632 **Representative micrographs of GFP-Kre28 (Full length and truncation) and Ndc80-**  
 633 **mCherry are shown, scale bar~3.2μm. Right: Scatter plot of Ndc80-mCherry intensities**  
 634 **(mean±s.e.m) is shown for strains with Kre28<sup>FL</sup> and kre28<sup>Δ127-183</sup>. Unpaired t-test**  
 635 **revealed p<0.0001, indicated at the top. (B) Left: Representative micrographs of GFP-**  
 636 **Kre28 (Full length and truncation) and Spc105-mCherry are shown, scale bar~3.2μm.**



637 On the right, scatter plot of Spc105-mCherry intensities (mean $\pm$ s.e.m) is shown.  
638 According to unpaired t-test  $p < 0.0001$ , indicated at the top. **(C)** (i) Left: Representative  
639 micrographs depict Spc105-GFP fluorescence from kinetochore cluster containing  
640 different amount of Kre28-mCherry, scale bar $\sim$ 2.1 $\mu$ m. Right: Scatter plot where each  
641 gray circle represents the binned average number of Spc105-GFP molecules plotted  
642 against the average number of Kre28-mCherry molecules per bioriented kinetochore.  
643 Line in the plot indicates non-linear regression.  $R^2 = 0.9774$ . (ii) Left: Representative  
644 micrographs show Kre28-mCherry fluorescence from kinetochore cluster containing  
645 different amount of Spc105-GFP, scale bar $\sim$ 2.1 $\mu$ m. Right: Scatter plot where each gray  
646 circle represents the binned average number of Kre28-mCherry molecules plotted  
647 against the average number of Spc105-GFP molecules per bioriented kinetochore. Line  
648 in the plot denotes non-linear regression.  $R^2 = 0.9751$ . (iii) Left: Representative  
649 micrographs depict Ndc80-GFP fluorescence from kinetochore cluster containing  
650 different amount of Kre28-mCherry, scale bar $\sim$ 2.1 $\mu$ m. Right: Scatter plot where each  
651 gray circle represents the binned average number of Ndc80-GFP molecules plotted  
652 against the average number of Kre28-mCherry molecules per bioriented kinetochore.  
653 Line in the plot denotes non-linear regression.  $R^2 = 0.9671$ . **(D)** Immunoblot assay with  
654 anti-GFP and anti-DsRed antibodies following RFP-trap assay on the cell lysates, flow  
655 through and the elutes of indicated strains. Ponceau S staining of the blot are shown as  
656 a loading control. Molecular weight of Spc105-mCherry, GFP-Kre28 and GFP-kre28 <sup>$\Delta$ 127-</sup>  
657 <sup>183</sup> are  $\sim$ 132 kDa,  $\sim$ 74 kDa and 67 kDa respectively. As stated previously, Spc105 runs  
658 between 150-250 kDa markers in 10% poly-acrylamide gels.

659

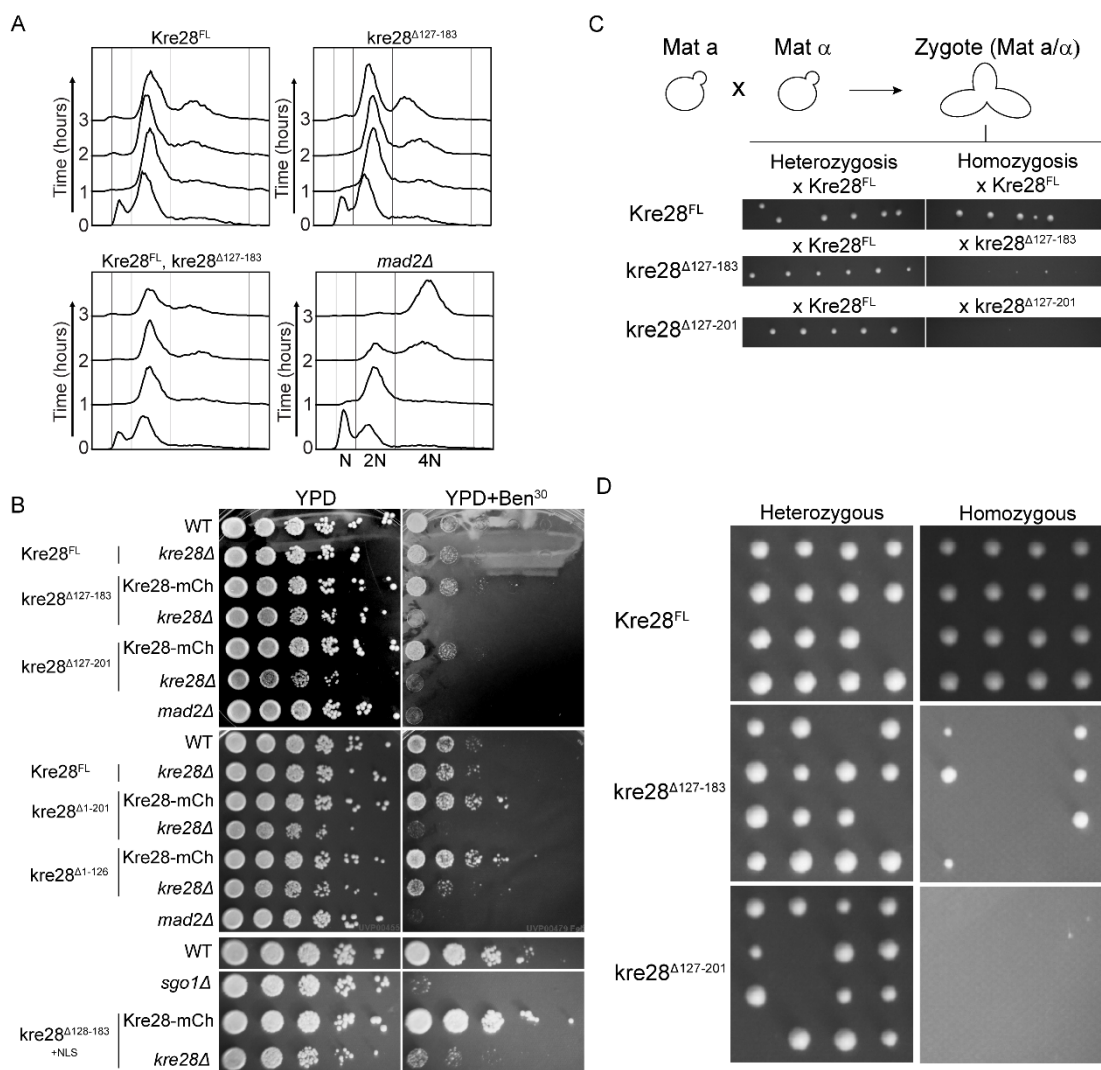

660

661

662 **Figure 5. Cells over expressing truncated Kre28 exhibit slower growth and defects**  
 663 **in SAC and/or error correction in kinetochore microtubule attachment. (A)** Flow  
 664 cytometry showing cell cycle progression of indicated strains that were treated with  
 665 Nocodazole. The 1n and 2n peaks correspond to G1 and G2/M cell populations  
 666 respectively. The dominant peak of the 4n in 3h sample of *mad2Δ* strain indicates  
 667 checkpoint null phenotype. The assay was repeated twice. Presence of a more  
 668 dominant 2N peak even in untreated samples (0h) of strains expressing Kre28<sup>FL</sup> may be  
 669 due to presence of centromeric plasmids. Any yeast strain that harbors centromeric  
 670 plasmids shows a delay in mitosis. **(B)** Haploids expressing Kre28<sup>FL</sup> or its truncated  
 671 forms are grown till log phase. Then cells with 0.1 OD<sub>600</sub> were taken and serially diluted

672 till  $10^{-6}$  OD<sub>600</sub> and spotted on YPD and YPD+ Benomyl (30µg/ml). Plates were incubated  
673 in 30°C for 2-3 days. The strains of *mad2Δ* and *sgo1Δ* were used as negative controls  
674 in these experiments. (C) Top: The illustration depicts the zygote formation by mating of  
675 haploid strains with opposite mating types which we isolated and incubated in normal  
676 non-selective growth media. Bottom: Plate images of crosses between 'a' mating type  
677 strains of Kre28<sup>FL</sup> or kre28 truncations and 'α' mating type of strains with Kre28<sup>FL</sup> or  
678 truncated form of Kre28 are shown. Approximately six zygotes were pulled for each  
679 cross. These experiments were replicated three times to see if the observations are  
680 reproducible. (D) Plate images of tetrad dissections of homozygotes (*kre28*<sup>Δ127-  
681 183</sup> × *kre28*<sup>Δ127-183</sup>) and heterozygotes (*kre28*<sup>Δ127-183</sup> × *Kre28*<sup>FL</sup>) are shown. To induce  
682 meiosis, the zygotes obtained from the crosses were first grown overnight in growth  
683 media and then transferred in sporulation media to be incubated for four to five days.  
684 After that, tetrads from each sporulation cultures were dissected.

685

686

687

688

689

690

691

692

693

694 **Supporting information**

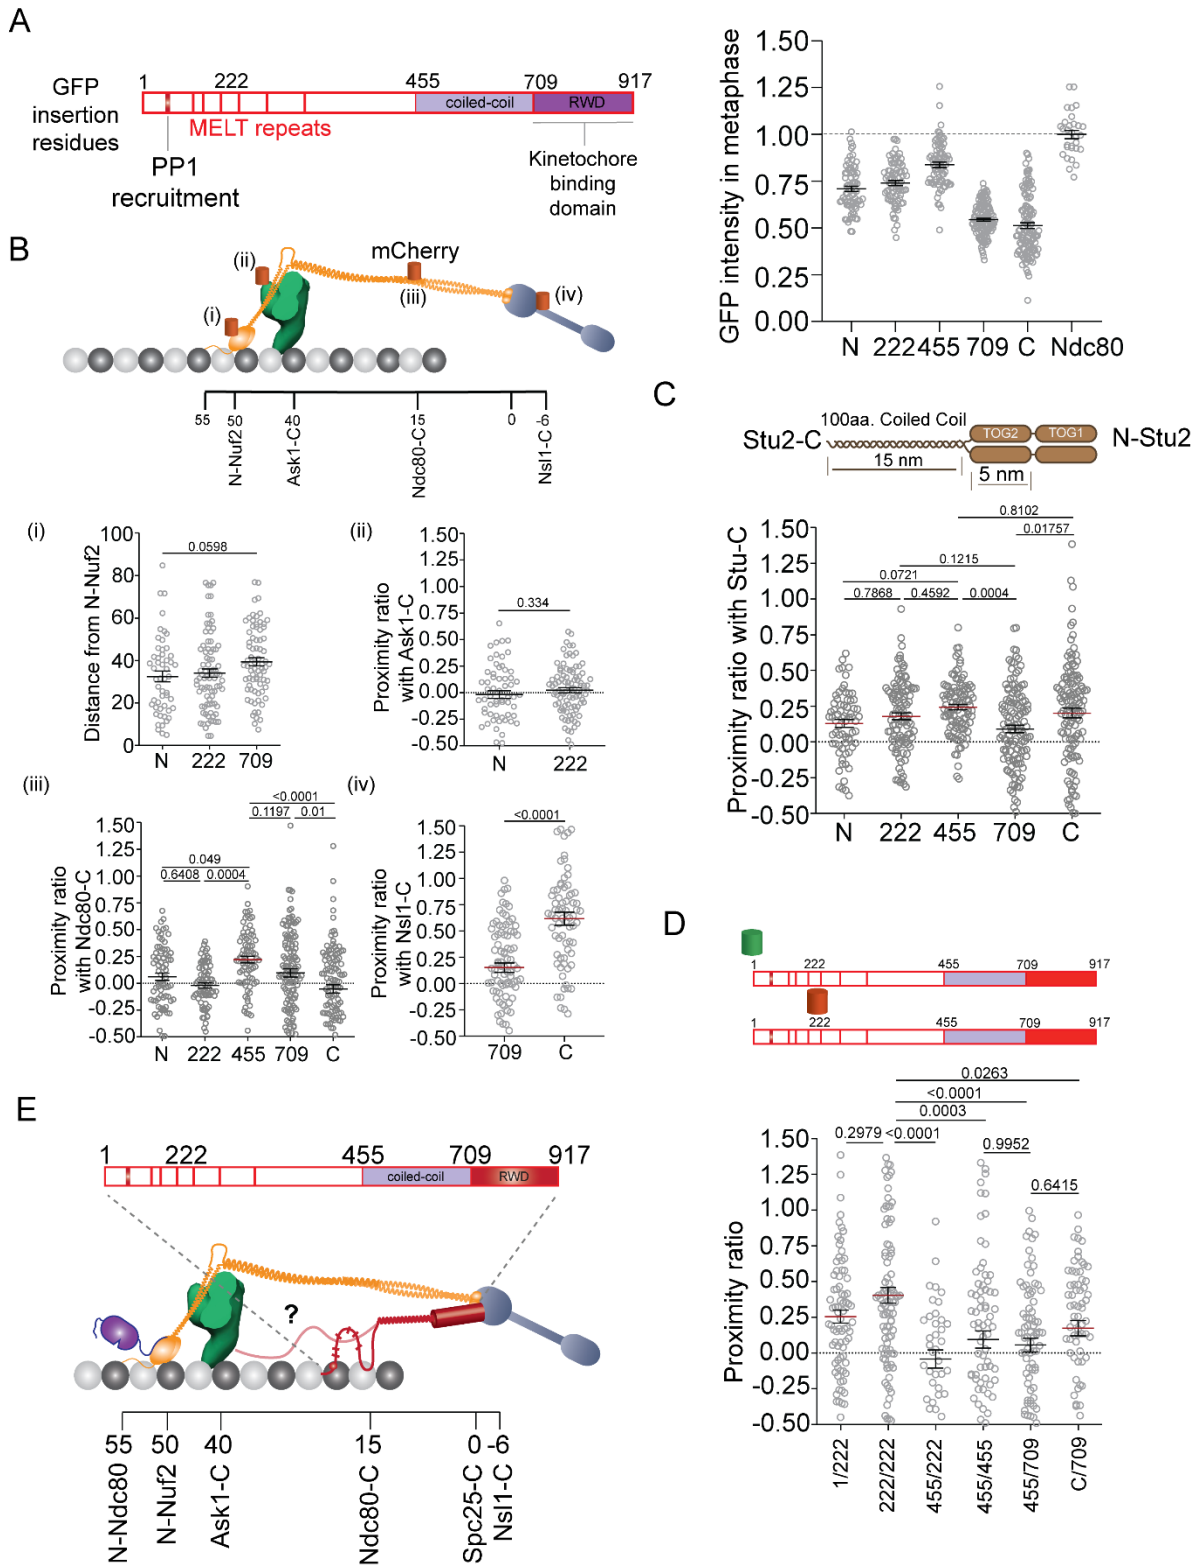

695

696 Supporting figure S1: Related to figure 1. **The N terminal phosphodomain of Spc105**  
 697 **(1-455) is highly disordered in nature.** (A) Left: Line diagram of Spc105 molecule.

698 The illustration was reproduced from our previous study [24]. Red bars represent  
699 PP1/Glc7 recruitment site (amino acid 75-79), and six MELT repeats. Amino acid  
700 locations of GFP fusion are shown at the top on N (1), amino acid 222, 455, 709 and C  
701 (917). Right: Scatter plot shows intensities of Spc105 (GFP at N, 222<sup>nd</sup>, 455<sup>th</sup>, 709<sup>th</sup>  
702 amino acids and at C termini) in bioriented kinetochores of yeast. Intensity of Ndc80-C  
703 is mentioned as a control. **(B)** Organization of Spc105 with respect to Ndc80, Mtw1 and  
704 Dam1 complexes. Top: The organization of kinetochore proteins in a metaphase  
705 kinetochore of yeast along the microtubule axis. Positions of C termini of Nsl1 (-6nm),  
706 Spc25/Spc24 (0nm), Ndc80/Nuf2 (15nm) and Dad4/Ask1 (40nm) and N termini of Nuf2  
707 (50nm) and Ndc80 (55nm) are shown. Red/orange barrel are shown to indicate  
708 mCherry tagging of N-Nuf2, Ask1-C, Ndc80-C and Nsl1-C in individual yeast strain.  
709 Bottom: (i) Scatter plot displaying distance between the centroids of 222, 455 and 709<sup>th</sup>  
710 amino acid positions of Spc105 and GFP-Nuf2 (N-Nuf2). At least 49 kinetochore foci  
711 were analyzed to obtain this data. Scatter plot of proximity ratio [directly proportional to  
712 FRET (Förster resonance energy transfer) [6]] with mean± s.e.m showing proximities of  
713 different amino acid positions of Spc105 molecules (222 for Spc105<sup>222::GFP</sup>, 455 for  
714 Spc105<sup>455::GFP</sup>, 709 for Spc105<sup>709::GFP</sup>, and C of Spc105-C) with Ask1-C (ii), Ndc80-C (iii)  
715 and Nsl1-C (iv). Minimum number of kinetochore foci analyzed to acquire this data: 62  
716 for Ask1-C, 75 for Ndc80-C and 76 for Nsl1-C. The p-values obtained by t-test or one-  
717 way anova test are mentioned above the graphs. We observed a high FRET between  
718 Nsl1-C and Spc105-C but the FRET decreases if the donor is moved to Spc105 709<sup>th</sup>  
719 amino acid. We noticed a mid to low FRET between Ndc80-C and Spc105<sup>455</sup>. **(C)**  
720 Organization of Spc105 with respect to Stu2, marker protein of microtubule plus ends.  
721 Top: Schematic diagram of Stu2 dimer [40, 47]. Bottom: Scatter plot with mean±s.e.m  
722 showing proximity ratio of different amino acid positions of Spc105 with Stu2-C. At least  
723 105 kinetochore foci were analyzed for this plot. The p-values obtained from one-way  
724 Anova test are mentioned at the top of plot. The position of MT plus tip and hence the  
725 position of Stu2 may vary from one kinetochore to another [6]. Our observations  
726 indicated low to moderate proximity for all the GFP insertion points of Spc105 that  
727 suggests the whole molecule of Spc105 remains in close proximity with MT lattice. **(D)**  
728 Proximity ratio showing FRET among the adjacent Spc105 molecules in metaphase

729 kinetochores. Minimum number of kinetochore foci examined for this graph is 40. Our  
730 observations are consistent with the previous studies which hypothesized that the  
731 Spc105 phosphodomains remain in close proximity with each other to create interaction  
732 foci of SAC proteins in unattached KT's [14, 48]. (E) Localization of Spc105 molecules  
733 with respect to other proteins in the KMN network of bioriented kinetochores. The  
734 illustration was reproduced from our previous study [24]. Although the C-terminus of this  
735 protein (amino acid 709-917) is structured and could be localized in the proximity of C-  
736 termini of Spc24/Spc25 and Nsl1, the N- terminal region (amino acid 1-455) is  
737 unstructured and could be localized within a 20nm region between C-termini of Dad4  
738 and that of Ndc80.

739

740

741

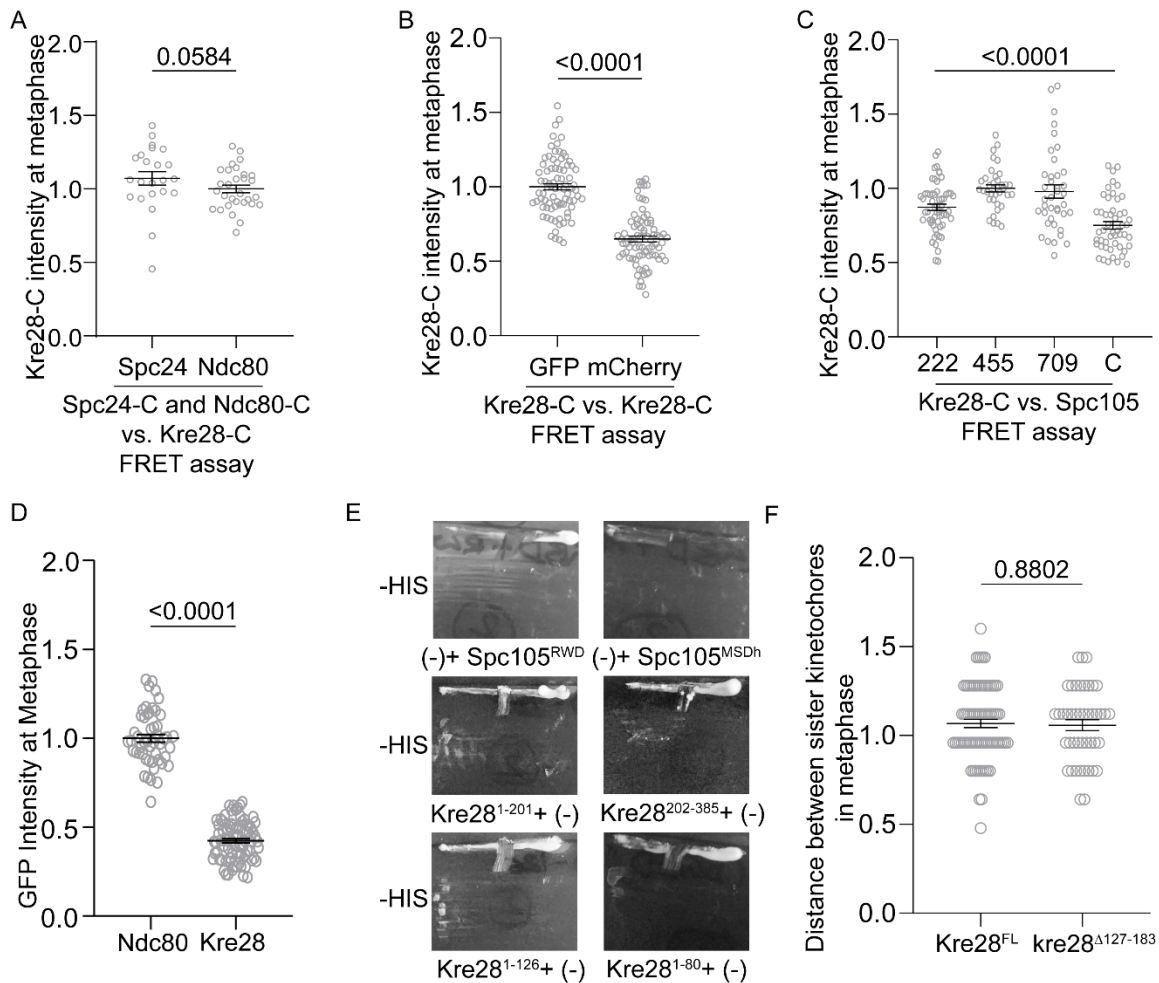

742

743 **Supporting figure S2: Related to figure 1, 2 and 4.** (A-C) Normalized intensities of  
 744 Kre28-C in 3 sets of FRET experiments. The dot plots are showing mean±s.e.m of  
 745 normalized intensities of Kre28-GFP or Kre28-mCherry. Data in (A) was normalized by  
 746 Kre28 intensity in FRET assay with Ndc80-GFP. Data in (B) was normalized by Kre28-  
 747 GFP. Data in (C) was normalized was Kre28 intensity in FRET experiment involving  
 748 Spc105<sup>455::GFP</sup>. (D) Normalized GFP intensities of Ndc80 and Kre28, localized at  
 749 bioriented kinetochores. (E) The plate images show control experiments of yeast two  
 750 hybrid assay performed in Figure 2 A. (F) Dot plot displays mean+s.e.m of distances  
 751 between sister kinetochores in metaphase cells expressing Kre28<sup>FL</sup> or kre28<sup>Δ127-183</sup>. At  
 752 the top of the plot, the p-value that was derived from the unpaired t-test done on the  
 753 data, is mentioned.

754



755 Table 2: **Strain used in this study**

| Strain (AJY#) | Genotype                                                                                                | Background |
|---------------|---------------------------------------------------------------------------------------------------------|------------|
| 2987          | <i>SPC105-GFP- KANMX6, NDC80-mCherry- KANMX6</i>                                                        | YEF473     |
| 3711          | <i>spc105Δ::NAT, Spc105<sup>709::GFP</sup> (LEU2), NDC80-mCherry- KANMX6</i>                            | YEF473     |
| 3712          | <i>spc105Δ::NAT, Spc105<sup>709::GFP</sup> (LEU2), NDC80-mCherry- KANMX6</i>                            | YEF473     |
| 3713          | <i>spc105Δ::NAT, Spc105<sup>455::GFP</sup> (LEU2), NDC80-mCherry- KANMX6</i>                            | YEF473     |
| 3714          | <i>spc105Δ::NAT, Spc105<sup>455::GFP</sup> (LEU2), NDC80-mCherry- KANMX6</i>                            | YEF473     |
| 3795          | <i>spc105Δ::NAT, GFP-SPC105 (HIS3), NDC80-mCherry-KANMX6</i>                                            | YEF473     |
| 3796          | <i>spc105Δ::NAT, GFP-SPC105 (HIS3), NDC80-mCherry- KANMX6</i>                                           | YEF473     |
| 3435          | <i>spc105Δ::NAT, Spc105<sup>222::GFP</sup> (LEU2), NDC80-mCherry- KANMX6</i>                            | YEF473     |
| 3513          | <i>spc105Δ::NAT, Spc105<sup>222::GFP</sup> (LEU2), STU2-mCherry-NAT</i>                                 | YEF473     |
| 3639          | <i>spc105Δ::NAT, GFP-SPC105 (HIS3), STU2-mCherry-NAT</i>                                                | BY4743     |
| 3641          | <i>spc105Δ::NAT, Spc105<sup>455::GFP</sup> (LEU2), STU2-mCherry-NAT</i>                                 | YEF473     |
| 3709          | <i>spc105Δ::NAT, Spc105<sup>709::GFP</sup> (LEU2), STU2-mCherry-NAT</i>                                 | YEF473     |
| 3710          | <i>spc105Δ::NAT, Spc105<sup>709::GFP</sup> (LEU2), STU2-mCherry-NAT</i>                                 | YEF473     |
| 3735          | <i>SPC105-GFP- KANMX6, STU2-mCherry-NAT</i>                                                             | YEF473     |
| 3736          | <i>SPC105-GFP-KANMX6, STU2-mCherry-NAT</i>                                                              | YEF473     |
| 3212          | <i>spc105Δ::NAT, GFP-SPC105 (HIS3), Spc105<sup>222::mCherry</sup> (CEN, LEU2)</i>                       | BY4743     |
| 3215          | <i>spc105Δ::NAT, GFP-SPC105 (HIS3), Spc105<sup>222::mCherry</sup> (CEN, LEU2)</i>                       | BY4743     |
| 3217          | <i>spc105Δ::NAT, Spc105<sup>222::GFP</sup> (URA3), Spc105<sup>222::mCherry</sup> (CEN, LEU2)</i>        | YEF473     |
| 3218          | <i>spc105Δ::NAT, Spc105<sup>222::GFP</sup> (URA3), Spc105<sup>222::mCherry</sup> (CEN, LEU2)</i>        | YEF473     |
| 3219          | <i>spc105Δ::NAT, Spc105<sup>455::GFP</sup> (URA3), Spc105<sup>222::mCherry</sup> (CEN, LEU2)</i>        | YEF473     |
| 3220          | <i>spc105Δ::NAT, Spc105<sup>455::GFP</sup> (URA3), Spc105<sup>222::mCherry</sup> (CEN, LEU2)</i>        | YEF473     |
| 3801          | <i>spc105Δ::NAT, Spc105<sup>455::GFP</sup> (URA3), Spc105<sup>455::mCherry</sup> (CEN, LEU2)</i>        | YEF473     |
| 3799          | <i>SPC105-GFP-KANMX6, Spc105<sup>709::mCherry</sup> (CEN, LEU2)</i>                                     | YEF473     |
| 3800          | <i>spc105Δ::NAT, Spc105<sup>455::GFP</sup> (URA3), Spc105<sup>709::mCherry</sup> (CEN, LEU2)</i>        | YEF473     |
| 3658          | <i>spc105Δ::NAT,GFP-SPC105 (HIS3), GAL1pr-mCherry-NUF2 (KANMX6)</i>                                     | BY4743     |
| 3659          | <i>spc105Δ::NAT, Spc105<sup>455::GFP</sup> (LEU2), GAL1pr-mCherry-NUF2 (KANMX6)</i>                     | YEF473     |
| 3660          | <i>spc105Δ::NAT, Spc105<sup>709::GFP</sup> (LEU2), GAL1pr-mCherry-NUF2 (KANMX6)</i>                     | YEF473     |
| 4171          | <i>SPC105-GFP-KANMX6, NSL1-mCherry-TRP1</i>                                                             | YEF473     |
| 4172          | <i>SPC105-GFP-KANMX6, NSL1-mCherry-TRP1</i>                                                             | YEF473     |
| 4175          | <i>spc105Δ::NAT, Spc105<sup>709::GFP</sup> (LEU2), NSL1-mCherry-TRP1</i>                                | YEF473     |
| 4176          | <i>spc105Δ::NAT, Spc105<sup>709::GFP</sup> (LEU2), NSL1-mCherry-TRP1</i>                                | YEF473     |
| 3760          | <i>spc105Δ::NAT, Spc105<sup>222::GFP</sup> (LEU2), ASK1-mCherry-NAT</i>                                 | YEF473     |
| 3794          | <i>spc105Δ::NAT, GFP-SPC105 (HIS3), ASK1-mCherry-NAT</i>                                                | YEF473     |
| 3107          | <i>GFP(S65T)-NDC80, KRE28-mCherry-HYG</i>                                                               | YEF473     |
| 2991          | <i>NDC80-GFP-KANMX6, KRE28-mCherry-HYG</i>                                                              | YEF473     |
| 2993          | <i>SPC24-GFP-KANMX6, KRE28-mCherry-HYG</i>                                                              | YEF473     |
| 3160          | <i>KRE28-GFP-KANMX6/KRE28-mCherry-HYG</i>                                                               | YEF473     |
| 3206          | <i>KRE28-GFP-KANMX6/KRE28-mCherry-HYG</i>                                                               | YEF473     |
| 2986          | <i>SPC105-GFP-KANMX6, KRE28-mCherry-HYG</i>                                                             | YEF473     |
| 3221          | <i>spc105Δ::NAT, Spc105<sup>222::GFP</sup> (CEN, LEU2), KRE28-mCherry-HYG</i>                           | YEF473     |
| 2977          | <i>spc105Δ::NAT, Spc105<sup>709::GFP</sup> (CEN, LEU2), KRE28-mCherry-Hyg</i>                           | YEF473     |
| 2982          | <i>spc105Δ::NAT, Spc105<sup>455::GFP</sup> (CEN, LEU2), KRE28-mCherry-HYG</i>                           | YEF473     |
| 3802          | <i>trp1-901, leu2-3,112 ura3-52, his3-200 gal4Δ, gal80Δ, GAL2-ADE2 LYS2::GAL1-HIS3, met2::GAL7-lacZ</i> | -          |
| 3278          | <i>Spc105Δ::NAT/SPC105</i>                                                                              | YEF473     |
| 5022          | <i>spc105Δ::NAT/SPC105, Spc105<sup>455::GFP</sup> (CEN,LEU2)</i>                                        | YEF473     |
| 5023          | <i>spc105Δ::NAT/SPC105, spc105<sup>Δ313-455::GFP</sup> (CEN,LEU2)</i>                                   | YEF473     |
| 5024          | <i>spc105Δ::NAT/SPC105, spc105<sup>Δ313-709::GFP</sup> (CEN,LEU2)</i>                                   | YEF473     |
| 5025          | <i>spc105Δ::NAT/SPC105, spc105<sup>Δ313-507::GFP</sup> (CEN,LEU2)</i>                                   | YEF473     |

|      |                                                                                             |        |
|------|---------------------------------------------------------------------------------------------|--------|
| 5026 | <i>spc105Δ::NAT/SPC105, spc105<sup>Δ313-638::GFP</sup> (CEN, LEU2)</i>                      | YEF473 |
| 6273 | <i>spc105Δ::NAT1, Spc105<sup>455::GFP</sup> (CEN, LEU2), KRE28-5xFlag-KANMX6</i>            | YEF473 |
| 6274 | <i>spc105<sup>Δ313-638::GFP</sup> (CEN, LEU2), KRE28-5xFlag-KANMX6</i>                      | YEF473 |
| 3298 | <i>kre28Δ::NAT/KRE28-mCherry-HYG</i>                                                        | YEF473 |
| 3386 | <i>KRE28-mcherry-HYG/kre28Δ::NAT, ADH1pr-GFP-kre28<sup>Δ127-183</sup> (CEN, TRP1)</i>       | YEF473 |
| 3387 | <i>KRE28-mCherry-HYG/kre28Δ::NAT, ADH1pr-GFP-kre28<sup>Δ127-201</sup> (CEN, TRP1)</i>       | YEF473 |
| 3390 | <i>KRE28-mCherry-HYG/kre28Δ::NAT, ADH1pr-GFP-KRE28<sup>FL</sup> (CEN, TRP1)</i>             | YEF473 |
| 3391 | <i>kre28Δ::NAT, ADH1pr-GFP- KRE28<sup>FL</sup> (CEN, TRP1)</i>                              | YEF473 |
| 3407 | <i>kre28Δ::NAT, ADH1pr-GFP- KRE28<sup>FL</sup> (CEN, TRP1)</i>                              | YEF473 |
| 3408 | <i>kre28Δ::NAT, ADH1pr-GFP-kre28<sup>Δ127-183</sup> (CEN, TRP1)</i>                         | YEF473 |
| 3409 | <i>kre28Δ::NAT, ADH1pr-GFP-kre28<sup>Δ127-201</sup> (CEN, TRP1)</i>                         | YEF473 |
| 3410 | <i>Kre28-mCh-Hyg, ADH1pr-GFP-kre28<sup>Δ127-183</sup> (CEN, TRP1)</i>                       | YEF473 |
| 3411 | <i>Kre28-mCh-Hyg, ADH1pr-GFP-kre28<sup>Δ127-201</sup> (CEN, TRP1)</i>                       | YEF473 |
| 3471 | <i>kre28Δ::NAT, ADH1pr-GFP-kre28<sup>Δ1-201</sup> (CEN, TRP1)</i>                           | YEF473 |
| 3472 | <i>KRE28-mCherry-HYG, ADH1pr-GFP-kre28<sup>Δ1-201</sup> (CEN, TRP1)</i>                     | YEF473 |
| 3473 | <i>kre28Δ::NAT, ADH1pr-GFP-kre28<sup>Δ1-127</sup> (CEN, TRP1)</i>                           | YEF473 |
| 3474 | <i>KRE28-mCherry-HYG, ADH1pr-GFP-kre28<sup>Δ1-127</sup> (CEN, TRP1)</i>                     | YEF473 |
| 4951 | <i>mad2Δ::TRP1</i>                                                                          | YEF473 |
| 4786 | <i>kre28Δ::NAT, ADH1pr-GFP-kre28<sup>Δ128-183+NLS</sup> (CEN, TRP1)</i>                     | YEF473 |
| 4787 | <i>kre28Δ::NAT, ADH1pr-GFP-kre28<sup>Δ128-183+NLS</sup> (CEN, TRP1)</i>                     | YEF473 |
| 4788 | <i>KRE28-mCherry-HYG, ADH1pr-GFP-kre28<sup>Δ128-183+NLS</sup> (CEN, TRP1)</i>               | YEF473 |
| 4660 | <i>sgo1Δ::Kan</i>                                                                           | YEF473 |
| 3477 | <i>KRE28-mCherry-HYG/ kre28Δ::NAT, KRE28pr-GFP-Kre28<sup>FL</sup>-Tr(KRE28) (LEU2)</i>      | YEF473 |
| 3494 | <i>KRE28-mCherry-HYG/kre28Δ::NAT, KRE28pr-GFP-kre28<sup>Δ127-183</sup>-Tr(KRE28) (LEU2)</i> | YEF473 |
| 3495 | <i>KRE28-mCherry-HYG/kre28Δ::NAT, KRE28pr-GFP-kre28<sup>Δ1-201</sup>-Tr(KRE28) (LEU2)</i>   | YEF473 |
| 3421 | <i>kre28Δ::NAT, ADH1pr-GFP-KRE28<sup>FL</sup>, NDC80-mCherry-KANMX6</i>                     | YEF473 |
| 3423 | <i>kre28Δ::NAT, ADH1pr-GFP-kre28<sup>Δ127-183</sup>, NDC80-mCherry- KANMX6</i>              | YEF473 |
| 3483 | <i>kre28Δ::NAT, ADH1pr-GFP-KRE28<sup>FL</sup> (CEN, TRP1), SPC105-mCherry-HIS3</i>          | YEF473 |
| 3484 | <i>kre28Δ::NAT, ADH1pr-GFP-kre28<sup>Δ127-183</sup> (CEN, TRP1), SPC105-mCherry-HIS3</i>    | YEF473 |
| 3101 | <i>NAT- GALLpr-SPC105-GFP-KAN, KRE28-mCherry-HYG</i>                                        | YEF473 |
| 3201 | <i>NAT- GALLpr-KRE28-mCherry-HYG, SPC105-GFP-KAN</i>                                        | YEF473 |
| 3202 | <i>NAT- GALLpr-KRE28-mCherry-HYG, NDC80-GFP-KAN</i>                                         | YEF473 |

756

757

758 **Table 3: Plasmids used in this study**

| Plasmid | Backbone | Description                                       |
|---------|----------|---------------------------------------------------|
| pAJ345  | pRS315   | <i>spc105<sup>Δ313-455::GFP</sup> (CEN, LEU2)</i> |
| pAJ346  | pRS315   | <i>spc105<sup>Δ313-709::GFP</sup> (CEN, LEU2)</i> |
| pAJ347  | pRS315   | <i>spc105<sup>Δ313-507::GFP</sup> (CEN, LEU2)</i> |
| pAJ348  | pRS315   | <i>spc105<sup>Δ313-638::GFP</sup> (CEN, LEU2)</i> |
| pAJ395  | pRS315   | <i>Spc105<sup>709::GFP</sup> (CEN, LEU2)</i>      |
| pAJ396  | pRS315   | <i>Spc105<sup>455::GFP</sup> (CEN, LEU2)</i>      |
| pAJ399  | pRS315   | <i>Spc105<sup>455::mCherry</sup> (CEN, LEU2)</i>  |
| pAJ414  | pRS305   | <i>Spc105<sup>709::GFP</sup> (URA3)</i>           |

|        |         |                                                                                     |
|--------|---------|-------------------------------------------------------------------------------------|
| pAJ415 | pRS306  | Spc105 <sup>455::GFP</sup> ( <i>URA3</i> )                                          |
| pAJ418 | pRS305  | Spc105 <sup>709::GFP</sup> ( <i>LEU2</i> )                                          |
| pAJ419 | pRS305  | Spc105 <sup>455::GFP</sup> ( <i>LEU2</i> )                                          |
| pAJ420 | pRS315  | Spc105 <sup>709::mCherry</sup> ( <i>CEN, LEU2</i> )                                 |
| pAJ423 | pRS315  | Spc105 <sup>222::GFP</sup> ( <i>CEN, LEU2</i> )                                     |
| pAJ446 | pRS315  | Spc105 <sup>222::mCherry</sup> ( <i>CEN, LEU2</i> )                                 |
| pAJ449 | pRS305  | Spc105 <sup>222::GFP</sup> ( <i>LEU2</i> )                                          |
| pAJ480 | pGAD_C1 | pGAD_C1+kre28_N (1-80) ( <i>LEU2</i> )                                              |
| pAJ481 | pGBD_C1 | pGBD_C1+spc105 <sup>RWD</sup> (Kinetochores binding domain 709-917) ( <i>TRP1</i> ) |
| pAJ482 | pGBD_C1 | pGBD_C1+spc105 <sup>SMD</sup> (Structural middle domain 455-709) ( <i>TRP1</i> )    |
| pAJ483 | pGAD_C1 | pGAD_C1 + kre28 <sup>1-126</sup> ( <i>LEU2</i> )                                    |
| pAJ484 | pGAD_C1 | pGAD_C1 + kre28 <sup>1-201</sup> ( <i>LEU2</i> )                                    |
| pAJ485 | pGAD_C1 | pGAD_C1 + kre28 <sup>201-385</sup> ( <i>LEU2</i> )                                  |
| pAJ494 | pRS414  | pRS414-ADH1+GFP+kre28 <sup>Δ202-385</sup> ( <i>CEN, TRP1</i> )                      |
| pAJ496 | pRS414  | pRS414-ADH1+GFP+kre28 <sup>Δ202-385</sup> +SV40-NLS ( <i>CEN, TRP1</i> )            |
| pAJ504 | pGAD_C1 | pGAD_C1+KRE28 <sup>FL</sup> ( <i>LEU2</i> )                                         |
| pAJ505 | pGBD_C1 | pGBD_C1+spc105 <sup>MSDh+RWD</sup> ( <i>TRP1</i> )                                  |
| pAJ510 | pRS414  | pRS414-ADH1pr+GFP+KRE28 <sup>FL</sup> ( <i>CEN, TRP1</i> )                          |
| pAJ511 | pRS414  | pRS414-ADH1pr+GFP+kre28 <sup>Δ127-183</sup> ( <i>CEN, TRP1</i> )                    |
| pAJ512 | pRS414  | pRS414-ADH1pr+GFP+kre28 <sup>Δ127-201</sup> ( <i>CEN, TRP1</i> )                    |
| pAJ524 | pRS414  | pRS414-ADH1pr+GFP+kre28 <sup>Δ1-201</sup> ( <i>CEN, TRP1</i> )                      |
| pAJ527 | pRS414  | pRS414-ADH1pr+GFP+kre28 <sup>Δ1-127</sup> ( <i>CEN, TRP1</i> )                      |
| pAJ531 | pRS305  | pRS305-KRE28pr-GFP-KRE28 <sup>FL</sup> -TrKRE28 ( <i>LEU2</i> )                     |
| pAJ536 | pRS305  | pRS305-KRE28pr-GFP- kre28 <sup>Δ127-183</sup> -TrKRE28 ( <i>LEU2</i> )              |
| pAJ537 | pRS305  | pRS305-KRE28pr-GFP- kre28 <sup>Δ1-201</sup> -TrKRE28 ( <i>LEU2</i> )                |
| pAJ538 | pRS305  | pRS305- KRE28pr-GFP- kre28 <sup>Δ1-126</sup> -TrKRE28 ( <i>LEU2</i> )               |
| pAJ766 | pRS414  | pRS414-ADH1pr+GFP+kre28 <sup>Δ127-183</sup> + SV40-NLS ( <i>CEN, TRP1</i> )         |

759

## 760 Disclosure of Potential Conflicts of Interest

761 There is no conflict of interest among the authors.

## 762 Funding

763 This work was financially supported by R01-GM-105948 to APJ.

## 764 Acknowledgements

765 We thank members of Joglekar lab for technical support, helpful discussions and  
766 positive criticism. We also like to thank Dr. Mara Duncan for providing us with reagents  
767 needed for this study and comments on this manuscript.

## 768 **Author contributions**

769 Experiments were planned and designed: APJ BR. Performed the experiments: APJ,  
770 BR and JS. Analyzed the data: APJ BR JS. Wrote the paper: APJ BR.

771

## 772 **References**

- 773 1 Cheeseman, I. M., Desai, A. 2008 Molecular architecture of the kinetochore–microtubule interface.  
774 *Nature Reviews Molecular Cell Biology*. **9**, 33-46. (10.1038/nrm2310)
- 775 2 Musacchio, A., Desai, A. 2017 A Molecular View of Kinetochore Assembly and Function. *Biology*. **6**, 5.  
776 (10.3390/biology6010005)
- 777 3 Roy, B., Varshney, N., Yadav, V., Sanyal, K. 2013 The process of kinetochore assembly in yeasts. *FEMS*  
778 *Microbiology Letters*. **338**, 107-117. (10.1111/1574-6968.12019)
- 779 4 Maure, J.-F., Komoto, S., Oku, Y., Mino, A., Pasqualato, S., Natsume, K., Clayton, L., Musacchio, A.,  
780 Tanaka, T. U. 2011 The Ndc80 Loop Region Facilitates Formation of Kinetochore Attachment to the  
781 Dynamic Microtubule Plus End. *Current Biology*. **21**, 207-213.  
782 (<https://doi.org/10.1016/j.cub.2010.12.050>)
- 783 5 Pearson, C. G., Maddox, P. S., Zarzar, T. R., Salmon, E. D., Bloom, K. 2003 Yeast Kinetochores Do Not  
784 Stabilize Stu2p-dependent Spindle Microtubule Dynamics. *Molecular Biology of the Cell*. **14**, 4181-4195.  
785 (10.1091/mbc.e03-03-0180)
- 786 6 Aravamudhan, P., Felzer-Kim, I., Gurunathan, K., Joglekar, Ajit P. 2014 Assembling the Protein  
787 Architecture of the Budding Yeast Kinetochore-Microtubule Attachment using FRET. *Current Biology*. **24**,  
788 1437-1446. (<https://doi.org/10.1016/j.cub.2014.05.014>)
- 789 7 Joglekar, A., Bloom, K., Salmon, E. D. 2009 In vivo protein architecture of the eukaryotic kinetochore  
790 with nanometer scale accuracy. *Curr Biol*. **19**, 694-699. (10.1016/j.cub.2009.02.056)
- 791 8 De Wulf, P., McAinsh, A. D., Sorger, P. K. 2003 Hierarchical assembly of the budding yeast kinetochore  
792 from multiple subcomplexes. *Genes & Development*. **17**, 2902-2921. (10.1101/gad.1144403)
- 793 9 Nekrasov, V. S., Smith, M. A., Peak-Chew, S., Kilmartin, J. V. 2003 Interactions between Centromere  
794 Complexes in *Saccharomyces cerevisiae*. *Molecular Biology of the Cell*. **14**, 4931-4946.  
795 (10.1091/mbc.E03-06-0419)
- 796 10 Jakopec, V., Topolski, B., Fleig, U. 2012 Sos7, an Essential Component of the Conserved  
797 *Schizosaccharomyces pombe* Ndc80-MIND-Spc7 Complex, Identifies a New Family of Fungal Kinetochore  
798 Proteins. *Molecular and Cellular Biology*. **32**, 3308-3320. (10.1128/mcb.00212-12)
- 799 11 Pagliuca, C., Draviam, V. M., Marco, E., Sorger, P. K., De Wulf, P. 2009 Roles for the Conserved  
800 Spc105p/Kre28p Complex in Kinetochore-Microtubule Binding and the Spindle Assembly Checkpoint.  
801 *PLOS ONE*. **4**, e7640. (10.1371/journal.pone.0007640)

- 802 12 Cheeseman, I. M., Niessen, S., Anderson, S., Hyndman, F., Yates, J. R., Oegema, K., Desai, A. 2004 A  
803 conserved protein network controls assembly of the outer kinetochore and its ability to sustain tension.  
804 *Genes & Development*. **18**, 2255-2268. (10.1101/gad.1234104)
- 805 13 Ghodgaonkar-Steger, M., Potocnjak, M., Zimniak, T., Fischböck-Halwachs, J., Solis-Mezarino, V.,  
806 Singh, S., Speljko, T., Hagemann, G., Drexler, D. J., Witte, G., *et al.* 2020 C-Terminal Motifs of the MTW1  
807 Complex Cooperatively Stabilize Outer Kinetochore Assembly in Budding Yeast. *Cell Reports*. **32**, 108190.  
808 (<https://doi.org/10.1016/j.celrep.2020.108190>)
- 809 14 Petrovic, A., Mosalaganti, S., Keller, J., Mattiuzzo, M., Overlack, K., Krenn, V., De Antoni, A.,  
810 Wohlgenuth, S., Cecatiello, V., Pasqualato, S., *et al.* 2014 Modular Assembly of RWD Domains on the  
811 Mis12 Complex Underlies Outer Kinetochore Organization. *Molecular Cell*. **53**, 591-605.  
812 (<https://doi.org/10.1016/j.molcel.2014.01.019>)
- 813 15 Petrovic, A., Pasqualato, S., Dube, P., Krenn, V., Santaguida, S., Cittaro, D., Monzani, S., Massimiliano,  
814 L., Keller, J., Tarricone, A., *et al.* 2010 The MIS12 complex is a protein interaction hub for outer  
815 kinetochore assembly. *Journal of Cell Biology*. **190**, 835-852. (10.1083/jcb.201002070)
- 816 16 Aravamudhan, P., Goldfarb, A. A., Joglekar, A. P. 2015 The kinetochore encodes a mechanical switch  
817 to disrupt spindle assembly checkpoint signalling. *Nature Cell Biology*. **17**, 868. (10.1038/ncb3179  
818 <https://www.nature.com/articles/ncb3179#supplementary-information>)
- 819 17 London, N., Ceto, S., Ranish, J. A., Biggins, S. 2012 Phosphoregulation of Spc105 by Mps1 and PP1  
820 Regulates Bub1 Localization to Kinetochores. *Curr Biol*. **22**, 900-906. (10.1016/j.cub.2012.03.052)
- 821 18 Primorac, I., Weir, J. R., Chirolì, E., Gross, F., Hoffmann, I., van Gerwen, S., Ciliberto, A., Musacchio, A.  
822 2013 Bub3 reads phosphorylated MELT repeats to promote spindle assembly checkpoint signaling. *eLife*.  
823 **2**, e01030. (10.7554/eLife.01030)
- 824 19 Rosenberg, Jessica S., Cross, Frederick R., Funabiki, H. 2011 KNL1/Spc105 Recruits PP1 to Silence the  
825 Spindle Assembly Checkpoint. *Current Biology*. **21**, 942-947.  
826 (<https://doi.org/10.1016/j.cub.2011.04.011>)
- 827 20 Dumont, S., Salmon, E. D., Mitchison, T. J. 2012 Deformations Within Moving Kinetochores Reveal  
828 Different Sites of Active and Passive Force Generation. *Science*. 1221886. (10.1126/science.1221886)
- 829 21 Varma, D., Wan, X., Cheerambathur, D., Gassmann, R., Suzuki, A., Lawrimore, J., Desai, A., Salmon, E.  
830 D. 2013 Spindle assembly checkpoint proteins are positioned close to core microtubule attachment sites  
831 at kinetochores. *Journal of Cell Biology*. **202**, 735-746. (10.1083/jcb.201304197)
- 832 22 Petrovic, A., Keller, J., Liu, Y., Overlack, K., John, J., Dimitrova, Y. N., Jenni, S., van Gerwen, S., Stege,  
833 P., Wohlgenuth, S., *et al.* 2016 Structure of the MIS12 Complex and Molecular Basis of Its Interaction  
834 with CENP-C at Human Kinetochores. *Cell*. **167**, 1028-1040.e1015.  
835 (<https://doi.org/10.1016/j.cell.2016.10.005>)
- 836 23 Maskell, D. P., Hu, X.-W., Singleton, M. R. 2010 Molecular architecture and assembly of the yeast  
837 kinetochore MIND complex. *Journal of Cell Biology*. **190**, 823-834. (10.1083/jcb.201002059)
- 838 24 Roy, B., Han, S. J. Y., Fontan, A. N., Joglekar, A. P. 2020 The copy-number and varied strengths of  
839 MELT motifs in Spc105 balance the strength and responsiveness of the spindle assembly checkpoint.  
840 *eLife*. **9**, e55096. (10.7554/eLife.55096)
- 841 25 Kiyomitsu, T., Murakami, H., Yanagida, M. 2011 Protein Interaction Domain Mapping of Human  
842 Kinetochore Protein Blinkin Reveals a Consensus Motif for Binding of Spindle Assembly Checkpoint  
843 Proteins Bub1 and BubR1. *Molecular and Cellular Biology*. **31**, 998-1011. (10.1128/mcb.00815-10)
- 844 26 Varma, D., Wan, X., Cheerambathur, D., Gassmann, R., Suzuki, A., Lawrimore, J., Desai, A., Salmon, E.  
845 D. 2013 Spindle assembly checkpoint proteins are positioned close to core microtubule attachment sites  
846 at kinetochores. *The Journal of Cell Biology*. **202**, 735-746. (10.1083/jcb.201304197)

- 847 27 Roy, B., Verma, V., Sim, J., Fontan, A., Joglekar, A. P. 2019 Delineating the contribution of Spc105-  
848 bound PP1 to spindle checkpoint silencing and kinetochore microtubule attachment regulation. *Journal*  
849 *of Cell Biology*. **218**, 3926-3942. (10.1083/jcb.201810172)
- 850 28 Aravamudhan, P., Chen, R., Roy, B., Sim, J., Joglekar, A. P. 2016 Dual mechanisms regulate the  
851 recruitment of spindle assembly checkpoint proteins to the budding yeast kinetochore. *Molecular*  
852 *Biology of the Cell*. **27**, 3405-3417. (10.1091/mbc.E16-01-0007)
- 853 29 Lacefield, S., Murray, A. W. 2007 The spindle checkpoint rescues the meiotic segregation of  
854 chromosomes whose crossovers are far from the centromere. *Nature Genetics*. **39**, 1273-1277.  
855 (10.1038/ng2120)
- 856 30 Tsuchiya, D., Gonzalez, C., Lacefield, S. 2011 The spindle checkpoint protein Mad2 regulates APC/C  
857 activity during prometaphase and metaphase of meiosis I in *Saccharomyces cerevisiae*. *Molecular*  
858 *Biology of the Cell*. **22**, 2848-2861. (10.1091/mbc.e11-04-0378)
- 859 31 Woo Seo, D., Yeop You, S., Chung, W.-J., Cho, D.-H., Kim, J.-S., Su Oh, J. 2015 Zwint-1 is required for  
860 spindle assembly checkpoint function and kinetochore-microtubule attachment during oocyte meiosis.  
861 *Sci Rep*. **5**, 15431-15431. (10.1038/srep15431)
- 862 32 Zhang, G., Lischetti, T., Hayward, D. G., Nilsson, J. 2015 Distinct domains in Bub1 localize RZZ and  
863 BubR1 to kinetochores to regulate the checkpoint. *Nature Communications*. **6**, 7162.  
864 (10.1038/ncomms8162)
- 865 33 Kriegenburg, F., Jakopec, V., Poulsen, E. G., Nielsen, S. V., Roguev, A., Krogan, N., Gordon, C., Fleig,  
866 U., Hartmann-Petersen, R. 2014 A Chaperone-Assisted Degradation Pathway Targets Kinetochore  
867 Proteins to Ensure Genome Stability. *PLOS Genetics*. **10**, e1004140. (10.1371/journal.pgen.1004140)
- 868 34 Yong-Gonzales, V., Hang, L. E., Castellucci, F., Branzei, D., Zhao, X. 2012 The Smc5-Smc6 Complex  
869 Regulates Recombination at Centromeric Regions and Affects Kinetochore Protein Sumoylation during  
870 Normal Growth. *PLOS ONE*. **7**, e51540. (10.1371/journal.pone.0051540)
- 871 35 Akiyoshi, B., Nelson, C. R., Duggan, N., Ceto, S., Ranish, J. A., Biggins, S. 2013 The Mub1/Ubr2  
872 Ubiquitin Ligase Complex Regulates the Conserved Dsn1 Kinetochore Protein. *PLOS Genetics*. **9**,  
873 e1003216. (10.1371/journal.pgen.1003216)
- 874 36 Lang, J., Barber, A., Biggins, S. 2018 An assay for de novo kinetochore assembly reveals a key role for  
875 the CENP-T pathway in budding yeast. *eLife*. **7**, e37819. (10.7554/eLife.37819)
- 876 37 Kasuboski, J. M., Bader, J. R., Vaughan, P. S., Tauhata, S. B. F., Winding, M., Morrissey, M. A., Joyce,  
877 M. V., Boggess, W., Vos, L., Chan, G. K., *et al.* 2011 Zwint-1 is a novel Aurora B substrate required for the  
878 assembly of a dynein-binding platform on kinetochores. *Molecular Biology of the Cell*. **22**, 3318-3330.  
879 (10.1091/mbc.e11-03-0213)
- 880 38 Jürg Bähler, Jian-Qiu Wu, Mark S. Longtine, Nirav G. Shah, Amos Mckenzie III, Alexander B. Steever,  
881 Achim Wach, Peter Philippsen, Pringle, J. R. 1998 Heterologous modules for efficient and versatile PCR-  
882 based gene targeting in *Schizosaccharomyces pombe*. *YEAST*. **14**, 943-951. (10.1002/(SICI)1097-  
883 0061(199807)14:10<943::AID-YEA292>3.0.CO;2-Y)
- 884 39 James, P., Halladay, J., Craig, E. A. 1996 Genomic Libraries and a Host Strain Designed for Highly  
885 Efficient Two-Hybrid Selection in Yeast. *Genetics*. **144**, 1425-1436.
- 886 40 Joglekar, A., Chen, R., Lawrimore, J. 2013 A Sensitized Emission Based Calibration of FRET Efficiency  
887 for Probing the Architecture of Macromolecular Machines. *Cellular and Molecular Bioengineering*. **6**,  
888 369-382. (10.1007/s12195-013-0290-y)
- 889 41 Joglekar, A. P., Bouck, D. C., Molk, J. N., Bloom, K. S., Salmon, E. D. 2006 Molecular architecture of a  
890 kinetochore-microtubule attachment site. *Nature Cell Biology*. **8**, 581. (10.1038/ncb1414)
- 891 <https://www.nature.com/articles/ncb1414#supplementary-information>)



- 892 42 Joglekar, A. P., Bloom, K., Salmon, E. D. 2009 In Vivo Protein Architecture of the Eukaryotic  
893 Kinetochore with Nanometer Scale Accuracy. *Current Biology*. **19**, 694-699.  
894 (<https://doi.org/10.1016/j.cub.2009.02.056>)
- 895 43 Sprague, B. L., Pearson, C. G., Maddox, P. S., Bloom, K. S., Salmon, E. D., Odde, D. J. 2003 Mechanisms  
896 of Microtubule-Based Kinetochore Positioning in the Yeast Metaphase Spindle. *Biophysical Journal*. **84**,  
897 3529-3546. ([https://doi.org/10.1016/S0006-3495\(03\)75087-5](https://doi.org/10.1016/S0006-3495(03)75087-5))
- 898 44 Gupta, A., Evans, R. K., Koch, L. B., Littleton, A. J., Biggins, S. 2018 Chapter 15 - Purification of  
899 kinetochores from the budding yeast *Saccharomyces cerevisiae*. In *Methods in Cell Biology*. (ed. eds. H.  
900 Maiato, M. Schuh), pp. 349-370: Academic Press.
- 901 45 Kosugi, S., Hasebe, M., Entani, T., Takayama, S., Tomita, M., Yanagawa, H. 2008 Design of Peptide  
902 Inhibitors for the Importin  $\alpha/\beta$  Nuclear Import Pathway by Activity-Based Profiling. *Chemistry & Biology*.  
903 **15**, 940-949. (<https://doi.org/10.1016/j.chembiol.2008.07.019>)
- 904 46 Kosugi, S., Hasebe, M., Tomita, M., Yanagawa, H. 2009 Systematic identification of cell cycle-  
905 dependent yeast nucleocytoplasmic shuttling proteins by prediction of composite motifs. *Proceedings of*  
906 *the National Academy of Sciences*. **106**, 10171-10176. (10.1073/pnas.0900604106)
- 907 47 Ayaz, P., Ye, X., Huddleston, P., Brautigam, C. A., Rice, L. M. 2012 A TOG: $\alpha\beta$ -tubulin Complex  
908 Structure Reveals Conformation-Based Mechanisms for a Microtubule Polymerase. *Science*. **337**, 857-  
909 860. (10.1126/science.1221698)
- 910 48 Kern, D. M., Kim, T., Rigney, M., Hattersley, N., Desai, A., Cheeseman, I. M. 2015 The outer  
911 kinetochore protein KNL-1 contains a defined oligomerization domain in nematodes. *Mol Biol Cell*. **26**,  
912 229-237. (10.1091/mbc.E14-06-1125)

913
